1  
2  
3  
4 Functional and comparative genome analysis reveals clade-specific  
5 genome innovations in the killer fungus *Candida auris*  
6  
7

8 Aswathy Narayanan<sup>1</sup>, Rakesh Netha Vadnala<sup>2</sup>, Promit Ganguly<sup>1</sup>, Pavitra  
9 Selvakumar<sup>2</sup>, Shivaprakash M Rudramurthy<sup>3</sup>, Rajendra Prasad<sup>4</sup>, Arunaloke  
10 Chakrabarti<sup>3</sup>, Rahul Siddharthan<sup>2</sup> and Kaustuv Sanyal<sup>1#</sup>  
11  
12

13 <sup>1</sup> Molecular Mycology Laboratory, Molecular Biology and Genetics Unit, Jawaharlal Nehru  
14 Centre for Advanced Scientific Research, Bangalore, India; <sup>2</sup> Computational Biology, The  
15 Institute of Mathematical Sciences/HBNI, Chennai, India; <sup>3</sup> Postgraduate Institute of Medical  
16 Education and Research, Chandigarh, India; <sup>4</sup> Amity Institute of Biotechnology, Haryana,  
17 India.  
18  
19  
20  
21  
22

23 #Corresponding author:

24 Kaustuv Sanyal

25 Molecular Biology & Genetics Unit

26 Jawaharlal Nehru Centre for Advanced Scientific Research

27 Jakkur, Bangalore - 560064

28 India  
29

30 Email: [sanyal@jncasr.ac.in](mailto:sanyal@jncasr.ac.in)

31 Telephone: +91-80-2208 2878

32 Fax: +91-80-2208 2766

33 Homepage: <http://www.jncasr.ac.in/sanyal>  
34  
35  
36  
37  
38  
39  
40  
41

## 42 **Abstract**

43 The thermotolerant multidrug-resistant ascomycete *Candida auris* rapidly emerged since  
44 2009 and simultaneously evolved in different geographical zones worldwide, causing  
45 superficial as well as systemic infections. The molecular events that orchestrated this sudden  
46 emergence of the killer fungus remain mostly elusive. Here, we identify centromeres in *C.*  
47 *auris* and related species, using a combined approach of chromatin immunoprecipitation and  
48 comparative genomic analyses. We find that *C. auris* and multiple other species in the  
49 *Clavispora/Candida* clade shared a conserved small regional centromere landscape lacking  
50 pericentromeres. Further, a centromere inactivation event led to karyotypic alterations in this  
51 species complex. Inter-species genome analysis identified several structural chromosomal  
52 changes around centromeres. In addition, centromeres are found to be rapidly evolving loci  
53 among the different geographical clades of the same species of *C. auris*. Finally, we reveal an  
54 evolutionary trajectory of the unique karyotype associated with clade 2 that consists of the  
55 drug susceptible isolates of *C. auris*.

56 **Keywords:** *Candida haemulonii*, *Candida duobushaemulonii*, *Candida pseudohaemulonii*,  
57 *Candida lusitaniae*, *Candida fructus*, chromosome number reduction, centromere relocation,  
58 ancestral genome

59

60

## 61 **Introduction**

62 First isolated from an infected ear of a patient in Japan in 2009, *Candida auris* emerged as a  
63 multidrug-resistant opportunistic fungal pathogen causing nosocomial infections worldwide  
64 in a short time span (Sato et al. 2009; Schelenz et al. 2016; Morales-López et al. 2017;  
65 Vallabhaneni et al. 2017; Ruiz-Gaitán et al. 2018). It can survive at elevated temperatures and  
66 high salt concentrations, which otherwise act as physiological barriers to fungal infections  
67 (Casadevall et al. 2019; Jackson et al. 2019). As a haploid ascomycete, *C. auris* often  
68 displays exceptional resistance to major antifungals like azoles and common sterilization  
69 agents, rendering it a difficult pathogen to treat (Emara et al. 2015; Cadnum et al. 2017;  
70 Chowdhary et al. 2018). As an opportunistic pathogen, *C. auris* colonises skin and causes  
71 systemic infections, thereby posing threats to patients with other clinical conditions like  
72 diabetes mellitus, chronic renal disease, and more recently COVID-19 infections (de Cássia  
73 Orlandi Sardi et al. 2018; Rodriguez et al. 2020). *C. auris* emerged and evolved

74 simultaneously as distinct geographical clades - South Asian (clade 1), East Asian (clade 2),  
75 South African (clade 3), South American (clade 4) and a potential fifth clade from Iran  
76 (Lockhart et al. 2017; Chow et al. 2019). The clades are separated by tens of thousands of  
77 single nucleotide polymorphisms (SNPs) but exhibit clonality within a clade (Lockhart et al.  
78 2017) . The mechanisms that underlie the sudden emergence and spread of *C. auris* as  
79 distinct geographical clades, though mostly unknown, represent rapid evolution modes in a  
80 fungal pathogen.

81 Both the pathogen and its host coevolve in nature to survive the evolutionary arms race.  
82 Chromosomal reshuffling serves to generate diversity in some predominantly asexual fungal  
83 pathogens (Sun et al. 2017; Guin, Chen, et al. 2020; Sankaranarayanan et al. 2020; Schotanus  
84 & Heitman 2020), thereby circumventing evolutionary dead ends. Chromosomal  
85 rearrangements and aneuploidy are also known to enhance drug resistance and virulence in  
86 primarily asexual fungi (Selmecki et al. 2008; Poláková et al. 2009; Legrand et al. 2019) .  
87 Centromeres (*CENs*), that appear as the primary constrictions on metaphase chromosomes,  
88 are emerging as a central hub of such chromosomal rearrangements contributing to karyotype  
89 diversity and speciation (Guin, Sreekumar, et al. 2020). Centromeres exhibit diversity in their  
90 properties like the length of centromeric chromatin, repeat/transposon content, and GC-  
91 richness. However, centromeric chromatin in most species is occupied by the *CEN*-specific  
92 histone variant CENP-A<sup>Cse4</sup>, that replaces canonical histone H3 in the centromeric  
93 nucleosomes and is regarded as the epigenetic hallmark defining *CEN* identity (McKinley &  
94 Cheeseman 2016; Yadav et al. 2018) . Centromeric chromatin also provides foundation for  
95 assembling several multiprotein complexes to form the kinetochore. Dynamic interactions of  
96 spindle microtubules and kinetochores result in the precise segregation of sister chromatids in  
97 daughter cells during cell division. Centromere clustering near the nuclear periphery is a  
98 conserved feature across the fungal kingdom (Sanyal & Carbon 2002; Padmanabhan et al.  
99 2008; Navarro-Mendoza et al. 2019; Fang et al. 2020). Due to spatial proximity, centromeres  
100 with homologous DNA sequences often participate in chromosomal rearrangements that  
101 result in chromosomal shuffling which can drive karyotype evolution and chromosome  
102 number alterations, contributing to the emergence of a new species (Guin, Chen, et al. 2020;  
103 Ola et al. 2020; Sankaranarayanan et al. 2020) .

104 *C. auris* is a sister species of three multidrug-resistant pathogens, namely, *Candida*  
105 *haemulonii*, *Candida duobushaemulonii*, and *Candida pseudohaemulonii*. These species are  
106 also closely related to another human fungal pathogen, *Candida lusitanae*, and together are

107 classified under the *Clavispora/Candida* clade of the family Metschnikowiaceae (Order:  
108 Saccharomycetales) (Gabaldón et al. 2016; Muñoz et al. 2018). Centromeres are susceptible  
109 to breaks in other fungal pathogens and are likely to contribute to the vast karyotype diversity  
110 exhibited by *C. auris* (Chatterjee et al. 2016; Bravo Ruiz et al. 2019; Guin, Chen, et al. 2020;  
111 Sankaranarayanan et al. 2020). We believed that studying the centromere structure and  
112 function in the *C. haemulonii* species complex and associated species may reveal  
113 mechanisms/events underlying the rapid evolution of the multidrug resistant fungal pathogen  
114 *C. auris*. In this study, we identified centromeres in all four clades of *C. auris* and leveraged  
115 the information to locate centromeres in the *C. haemulonii* complex species. Functional  
116 identification of centromeres combined with comparative genome analysis in these group of  
117 species helped us propose that a centromere inactivation event from an ancestral species  
118 facilitated genome innovations that led to the clade-specific parallel evolution of *C. auris*.

## 119 **Results**

### 120 ***C. auris* possesses small regional CENP-A<sup>Cse4</sup>-rich GC-poor, repeat-free centromeres**

121 The histone H3 variant CENP-A<sup>Cse4</sup> is exclusively associated with centromeric nucleosomes.  
122 The homolog of CENP-A<sup>Cse4</sup> was identified in *C. auris*, using the *C. albicans* CENP-A<sup>Cse4</sup>  
123 protein sequence as the query against the *C. auris* genome (GenBank assembly  
124 GCA\_002759435.2). The putative *C. auris* CENP-A<sup>Cse4</sup> protein is 136 amino acid long and  
125 shares a 72% sequence identity with the *C. albicans* homolog (C3\_00860W\_A)  
126 (supplementary fig. 1). Previous studies suggested that the haploid genome of *C. auris* is  
127 distributed in seven chromosomes (Muñoz et al. 2018). To locate centromeres on each  
128 chromosome, we constructed a strain CauI46 expressing Protein A-tagged CENP-A<sup>Cse4</sup> from  
129 a clade 1 Indian isolate Cau46 (supplementary fig. 2A). Immunofluorescence staining using  
130 anti-Protein A antibodies revealed punctate localization of CENP-A<sup>Cse4</sup> at the nuclear  
131 periphery, suggesting typical kinetochore clustering at interphase and mitotic stages of the  
132 cell cycle (fig. 1A). High amino-acid sequence similarities with other proteins of the CENP-  
133 A family and typical localization patterns of the clustered centromeres at the nuclear  
134 periphery confirmed that the identified protein is, indeed, CENP-A<sup>Cse4</sup> in *C. auris*. To identify  
135 CENP-A<sup>Cse4</sup> associated DNA sequences as centromeric chromatin on each chromosome of *C.*  
136 *auris*, we performed CENP-A chromatin immunoprecipitation (ChIP) followed by  
137 sequencing (ChIP-sequencing) in the strain CauI46. Sonicated genomic DNA-without  
138 antibodies was also subjected to high-throughput sequencing that served as the input DNA  
139 control. The CENP-A<sup>Cse4</sup> ChIP-seq analysis identified a single-peak in each of the seven

140 different scaffolds out of 15 scaffolds of the publicly available *C. auris* clade 1 reference  
141 genome assembly (fig. 1B). The CENP-A<sup>Cse4</sup> enriched centromeric chromatin across  
142 chromosomes spans 2516 bp to 2908 bp, with an average length of 2727 bp (table 1). Further  
143 analysis of these regions suggests that CENP-A<sup>Cse4</sup>-enriched core centromere (*CEN*) loci in  
144 *C. auris* are largely devoid of ORFs and represent poly-(A) transcriptional cold spots (fig.  
145 1C). To further confirm ChIP-seq results, ChIP-quantitative PCR (ChIP-qPCR) using specific  
146 primers was performed to measure CENP-A<sup>Cse4</sup> abundance at *CENs* compared to a non-  
147 centromeric genomic locus, ~200 kb away from *CEN4* (*far-CEN4*). The same centromeric  
148 and non-centromeric primer pairs (supplementary table 3) were used to assess the canonical  
149 histone H3 occupancy in the corresponding regions by histone H3 ChIP-qPCR analysis. As  
150 expected, histone H3 levels were significantly depleted at the *CENs* compared to the *far-CEN*  
151 region (fig. 1D). Binding of CENP-A<sup>Cse4</sup> to transcriptionally inert, histone H3-depleted loci of  
152 comparable length on different contigs strongly indicates that these genomic regions  
153 correspond to authentic centromeric chromatin.

154 Homology searches for *CEN* sequences among themselves and against the whole  
155 genome did not yield any significant results, suggesting that each DNA sequence underlying  
156 centromeric chromatin is unique and different. A dot-plot comparing each centromere DNA  
157 sequence against itself as well as other centromeric sequences suggested the unique nature of  
158 sequences and the absence of DNA sequence repeats in *C. auris* centromeres (fig. 1F).  
159 Searches for specific DNA sequence motifs also did not detect any, except the poly (A) and  
160 poly (T) stretches, which are present in all the seven regions, though not exclusive to the  
161 centromeres (supplementary fig. 2B). The presence of poly(A) stretches at all centromeres  
162 prompted us to analyse the GC-content of the *CEN* sequences identified. Two sequence  
163 features were investigated using the sliding window approach- GC content (the percentage of  
164 G and C residues in the scaffold in a sliding window of 5 kb, with a step size of 1 kb) and  
165 GC3 content (GC content at the third position of codons in the annotated ORFs, across the  
166 scaffolds). These studies revealed the overlap of *C. auris* centromeres with deep GC and GC3  
167 troughs in all the scaffolds (fig. 1G).

168 At each of the seven centromeres in *C. auris*, core CENP-A<sup>Cse4</sup> chromatin occupies  
169 the entire ORF-free region, often extending partially to the neighbouring centromere-  
170 proximal ORFs. By comparing the lengths of CENP-A<sup>Cse4</sup>-bound and the associated ORF-  
171 free regions in the previously characterized centromeres of Ascomycota, we observed that  
172 centromeric chromatin tends to possess a localized region within the gene-poor zones in  
173 species like *C. albicans* and *S. cerevisiae*. Exceptionally, the ratio of centromeric chromatin

174 to the remaining ORF-free pericentric region in *C. auris*, similar to that of *C. lusitaniae*, is  
175 close to 1 (supplementary fig. 2C). Thus, *C. auris*, like *C. lusitaniae* seems to lack pericentric  
176 heterochromatin (Kapoor et al. 2015). We analysed RNA-seq data available for *C. auris*  
177 (SRR6900290, SRR6900291, SRR6900292, SRR6900293) to examine variations of gene  
178 expression at the centromere vicinity that might indicate the presence of pericentric  
179 heterochromatin. We could not detect any suppression of gene expression in the centromere  
180 neighbourhoods (supplementary fig. 2D, E), confirming that *C. auris*, like *C. lusitaniae*,  
181 possess pericentric heterochromatin-deficient (PHD) centromeres (supplementary fig. 2F).  
182 Pericentric heterochromatin formation is a concerted function of pericentric repeats, RNA  
183 interference machinery, chromodomain proteins, methyl transferases as well as histone  
184 deacetylases. However, these factors have a patchy distribution in the fungal kingdom  
185 (Bühler & Moazed 2007; Drinnenberg et al. 2009; Hickman et al. 2011; Alper et al. 2013).  
186 As expected, orthologs of many heterochromatin-forming proteins could not be detected in  
187 the *C. auris* and *C. haemulonii* complex species (supplementary table 4). Though orthologs of  
188 Dcr1 (the non-canonical Dicer protein) are present, Ago1 (Protein argonaute) and Rdp1  
189 (RNA-dependent RNA polymerase) could not be detected in any of these ascomycetes.  
190

### 191 **Clade-specific karyotype alterations in *C. auris* involve centromeres**

192 Clinical isolates of *C. auris* have been primarily classified into four geographical  
193 clades, which exhibit differences in virulence, drug resistance, and genome plasticity. Having  
194 identified centromeres in a clade 1 isolate, we sought to identify centromere loci in other  
195 clades of *C. auris*. Are the centromeres and their neighbourhoods conserved in sequence and  
196 location across different geographical clades? To answer this, we predicted the putative  
197 centromere coordinates in clades 2, 3, and 4 of *C. auris* based on gene synteny, GC-content,  
198 and ORF-content using the available assemblies (GCA\_003013715.2 of strain B11220 for  
199 clade 2, GCA\_005234155.1 of strain LOM for clade 3, and GCA\_008275145.1 of strain  
200 B11245 for clade 4) (fig. 2A). The predictions were experimentally tested using strains  
201 expressing CENP-A<sup>Cse4</sup> - Protein A fusion proteins in each of these three clades. The  
202 predicted loci were enriched with CENP-A<sup>Cse4</sup> and depleted of canonical histone H3  
203 (supplementary fig. 3A, B, D, E, G, H). Like clade 1, all seven identified centromeres in each  
204 of the three clades overlap with GC- and GC3-troughs (supplementary fig. 3C, F, I). Taken  
205 together, we identify small regional AT-rich centromere loci of all chromosomes in each of  
206 the four clades of *C. auris*.



207           Next, we performed genome-wide comparisons using the publicly available  
208 chromosome-level assemblies of *C. auris* to study the involvement of centromeres in clade-  
209 specific rearrangements, if any. From MLST analysis based on *RPB2* (Prakash et al. 2016),  
210 *TUB2*, and *EFB2* gene sequences, we observed that strain A1, isolated in China  
211 (SRS4986047), belongs to clade 3 and strain CA-AM1 (SRS7388889), isolated in Italy,  
212 belongs to clade 1. Centromere locations in these isolates were also identified. Centromere  
213 coordinates of all the isolates analysed are listed in supplementary table 5. Based on the  
214 presence of centromeres and syntenic regions shared with CA-AM1, we propose the merger  
215 of scaffold PEKT02000002.1 to PEKT02000001.1, PEKT02000005.1 to PEKT02000003.1,  
216 and PEKT02000004.1 to PEKT02000007.1 in the current reference assembly of clade 1 to  
217 fill the gaps and construct an improved assembly.

218           Both GCA\_014673535.1 (for strain CA-AM1) and GCA\_014217455.1 (for strain  
219 A1), being complete assemblies with seven contigs, were used as clade 1 and clade 3  
220 assembly, respectively, for genome-wide comparisons. All combinations of pair-wise  
221 comparisons revealed inter-clade chromosomal changes in *C. auris*. Representative images  
222 using clade 4 (GCA\_008275145.1) assembly as the reference is shown in fig. 2B.  
223 Centromeres were numbered from 1 to 7 in the clade 4 assembly based on the decreasing  
224 sizes of the chromosomes harbouring them. Centromeres of clades 1, 2, and 3 were numbered  
225 based on synteny with clade 4 *CENs*. Cross-clade comparisons revealed the genome of clade  
226 2 to be the most rearranged one compared to the other three clades, as reported previously  
227 (Muñoz et al. 2019) (fig. 2B). Five out of seven chromosomes in clade 2 had undergone  
228 chromosomal rearrangements, and two of these rearrangements in chromosomes 1 and 3  
229 involve synteny breaks adjacent to the centromeres. These structural changes resulted in  
230 centromere relocations in clade 2 compared to other clades, generating significant karyotype  
231 alterations (fig. 2C). We also detected a segmental duplication in the clade 2 reference  
232 assembly (GCA\_003013715.2). Duplication of a 145 kb fragment in contig000006 in the  
233 clade 2 assembly places two copies of the centromere region on the same contig, separated by  
234 144 kb (fig. 2D).

235           Centromeres were earlier shown to be the most rapidly evolving loci in two closely  
236 related species of the CTG-Ser1 clade: *Candida albicans* and *Candida dubliniensis*  
237 (Padmanabhan et al. 2008). A similar genome-wide analysis among the clades of *C. auris*  
238 suggested that centromeres exhibit high incidence of substitution mutations compared to the  
239 intergenic regions of the genome. This is true for all the clades, though the rates of sequence  
240 changes are different (fig. 2E, supplementary table 6). Hence, a geographical clade-specific

241 accelerated evolution of centromere sequences in the same species is evident from these  
242 analyses.

243

#### 244 ***C. haemulonii* and related species share centromere properties with *C. auris***

245 The size of the *C. auris* genome is 12.2-12.4 Mb that falls in the same range with  
246 genomes of phylogenetically related, multidrug-resistant, pathogenic species *C. haemulonii*,  
247 *C. duobushaemulonii*, and *C. pseudohaemulonii* of sizes 13.3 Mb, 12.6 Mb, and 12.6 Mb,  
248 respectively (based on corresponding NCBI GenBank assemblies-see Methods). Since all  
249 these species of the *C. haemulonii* complex share similar biochemical properties, the  
250 misidentification of species in clinics is quite common. Gene synteny around the *CEN*  
251 neighbourhoods in these species is conserved compared to *C. auris*, enabling the prediction  
252 of *CEN* coordinates (fig. 3A, supplementary fig. 4A, E). The predicted *CEN* regions were  
253 also found to be histone H3-depleted and overlapping with scaffold GC-and GC3 minima  
254 (fig. 3B, 3C, supplementary fig. 4B-D, F-H), suggesting that these are the bona fide *CENs*.  
255 The identified regions are largely free of ORFs and have lengths comparable to those of *C.*  
256 *auris* *CENs* (supplementary table 7). Comparisons utilizing the available chromosome level  
257 assembly of *C. duobushaemulonii* revealed that this species is closer to clades 1, 3, and 4 than  
258 clade 2 of *C. auris* (supplementary fig. 5A-C), further corroborating the distinctiveness of  
259 clade 2, isolates of which are usually drug sensitive.

260

#### 261 **A centromere inactivation event accounts for the chromosome number alteration** 262 **between *C. lusitaniae* and *C. auris*.**

263 *Candida lusitaniae*, another opportunistic pathogen, is classified under the  
264 *Clavipora/Candida* clade of Metschnikowiaceae and is phylogenetically close to *C. auris*  
265 (fig. 4A). It was previously reported to have eight AT-rich short regional *CENs* made up of  
266 unique DNA sequences (Kapoor et al. 2015). On the other hand, we report that *C. auris* has  
267 seven functional *CENs* identified in this study. To trace the events that led to the chromosome  
268 number reduction during the divergence of these two species, we compared the gene synteny  
269 across the centromeres in *C. lusitaniae* and *C. auris*. Though the genomes are highly  
270 rearranged (supplementary fig. 5D), we found that the gene synteny around centromeres is  
271 conserved between the two species. Intriguingly, chromosome 8 of *C. lusitaniae* was  
272 rearranged as three distinct fragments that fused with other chromosomes of *C. auris*. As a  
273 result, two *C. lusitaniae* centromeres (*CICEN2* and *CICEN8*) were mapped to the same *C.*  
274 *auris* chromosome, based on synteny analysis (fig. 4B). ChIP-seq analysis revealed *CEN2* to



275 be functional in *C. auris* out of the two regions as CENP-A<sup>Cse4</sup> is recruited only at *CEN2*.  
276 This observation illustrates a clear example of “evolution in progress” as the region  
277 corresponding to *C. lusitaniae* *CEN8* becomes non-functional in *C. auris* despite gene  
278 synteny conservation between the two species around this region. *CICEN8*, the functional  
279 centromere of chromosome 8 in *C. lusitaniae*, spans a region of around 4.5 kb, while the  
280 average centromere length is 4.3 kb. The size of the corresponding syntenic regions of the  
281 inactivated centromere (*inCEN*) is 1.1 kb in *C. auris*. In comparison, the functional  
282 centromeres of the same species have an average length of 2.7 kb. We posit that the  
283 significant, centromere-specific attrition of DNA sequence accompanied by the reduction of  
284 AT-content resulted in the centromere inactivation in *C. auris* (fig. 4C). Analysis at the  
285 sequence level reveals mutation rates at the *inCEN* to be intermediate of that of centromeres  
286 and intergenic regions, further suggesting a “transition from centromeric to intergenic region”  
287 (supplementary table 6).

288 A distinct *CEN*-associated structural change observed in *C. auris*, compared to the  
289 syntenic *CEN* in *C. lusitaniae*, is a pericentric inversion altering the relative positions of three  
290 ORFs (fig. 4D). In addition to the presence of *inCEN*, five centromere regions in *C.*  
291 *lusitaniae* have syntenic centromeres in *C. auris*. The remaining two, identified through  
292 CENP-A<sup>Cse4</sup> ChIP-seq, are located at syntenic breakpoints and hence, are involved in  
293 chromosomal rearrangements. The immediate ORFs flanking *CEN3* in *C. lusitaniae* are  
294 conserved in *C. auris* but are separated by a length of 55 kb. The centromere is located  
295 adjacent to one of the syntenic blocks, resulting in partial synteny conservation (fig. 4E). We  
296 also mapped a syntenic breakpoint at the centromere on chromosome 2 of *C. auris*. The ORFs  
297 on either side of the

298 *C. auris* *CEN2* maps to different chromosomes in *C. lusitaniae* (fig. 4F).  
299 The same patterns were observed in *C. haemulonii*, *C. duobushaemulonii*, and *C.*  
300 *pseudohaemulonii*, where sequences syntenic to *CICEN8*-flanking blocks map to the same  
301 scaffold bearing *CICEN2* syntenic regions (fig. 4G, supplementary fig. 6A, B). The region  
302 corresponding to *CICEN8* has undergone differential sequence attrition in these species,  
303 resulting in reduced sequence length (840 bp in *C. haemulonii*, 361 bp in *C.*  
304 *duobushaemulonii*, and 496 bp in *C. pseudohaemulonii*) as observed in *C. auris* *inCEN*.  
305 *CEN*-specific sequence loss has also resulted in the reduction of AT-content in these species.  
306 *CEN*-associated inversions and syntenic breakpoints in these species are also identical to those  
307 in *C. auris* (fig. 4H-J, supplementary fig. 6C-H). The typical patterns of *CEN*-associated

308 changes in *C. auris* and other species of the *C. haemulonii* complex suggest that these events  
309 must have occurred in an immediate common ancestor before species divergence.

310

311 **Putative small regional, AT-rich centromeres identified in other species of the**  
312 ***Clavispora/Candida* clade**

313         Around 40 ascomycetous species are classified under the *Clavispora/Candida* clade  
314 of Metschnikowiaceae (Daniel et al. 2014). To explore the centromere properties in the  
315 *Clavispora/Candida* clade, we attempted *CEN* identification in other species for which  
316 genome assemblies are available (fig. 4A). We could locate putative centromeres in several  
317 fungal species of the *Clavispora/Candida* clade of Metschnikowiaceae based on the  
318 conserved gene synteny and other conserved centromere properties of *C. auris* and *C.*  
319 *lusitaniae* as references (supplementary table 8-12). Two possible chromosome number states  
320 were detected in the *Clavispora/Candida* clade, and the analysed genomes were classified  
321 into two groups – a) species which have eight AT-rich putative centromeric loci of  
322 comparable sizes, and b) species with seven AT-rich putative centromeric loci with an eighth  
323 locus that had undergone sequence loss despite synteny conservation around the orthologous  
324 but presumably inactivated centromere locus. *C. lusitaniae* has eight AT-rich, ORF-free  
325 centromeres of comparable lengths. *Candida fructus* was found to possess eight loci syntenic  
326 to each of the eight centromeres in *C. lusitaniae*. The identified regions are also depleted of  
327 ORFs, are GC-poor, and harbour GC-skews like *C. lusitaniae* centromeres (supplementary  
328 fig. 7). Each of *C. auris*, other species of the *C. haemulonii* complex, and *Candida heveicola*  
329 has seven ORF-free loci, which are GC-poor. The eighth locus, though syntenic to *CEN8* of  
330 *C. lusitaniae*, has undergone sequence attrition in each of them and is likely to be inactive,  
331 like the *inCEN* of *C. auris*. We could identify loci in other related species, including *Candida*  
332 *intermedia*, *Candida blattae*, and *Candida oregonensis* syntenic to each of the seven  
333 centromeres of *C. auris*. All the predicted regions are ORF-free, AT-rich, and constituted by  
334 unique, repeat-free sequences (supplementary fig. 8A, B). We also identified an eighth locus  
335 syntenic to *C. lusitaniae CEN8* in these species. Unlike the *inCEN* in *C. auris* with a  
336 drastically reduced sequence length, the eighth locus is of similar size as other predicted  
337 centromeres in these three species (supplementary fig. 8A, C). The conservation of sequence  
338 length suggests that they may have eight functional centromeres. Exceptionally due to a  
339 possible assembly error, two putative centromeres identified in *C. intermedia* map to the  
340 same scaffold. Our *in silico* analyses collectively suggest the existence of two chromosome  
341 number states and remarkably similar centromere properties shared by these closely related

342 organisms of the *Clavispora/Candida* clade. While all these putative *CEN* loci show similar  
343 gene synteny, ORF-abundance, sequence length, and GC-content, further experimental  
344 validation is required before assigning them as authentic *CEN* loci of the respective  
345 organisms.

346

### 347 **Clade 2 of *C. auris* follows a unique evolutionary trajectory**

348 We posit that *C. lusitaniae* and *C. fructus* might have shared an immediate common  
349 ancestor CA1 with eight functional *CENs*, one on each chromosome ( $N=8$ ). Chromosomal  
350 rearrangements placed regions syntenic to *CEN2* and *CEN8* of these two species on the same  
351 chromosome in the *C. haemulonii* complex species as well as three clades (clades 1, 3, and 4)  
352 of *C. auris*, out of which *CICEN2* is active, and *CICEN8* is inactive (*inCEN*) (fig. 5A). This  
353 finding indicates the existence of an immediate common ancestor ( $N=7$ ), CA2, with a  
354 *CICEN2-inCEN* configuration shared by *C. auris* and other species of the *C. haemulonii*  
355 complex. Synteny analyses enabled us to reconstruct (fig. 5A) *CEN*-based ancestral genomes  
356 of the immediate common ancestors of *C. lusitaniae-C. fructus* and *C. haemulonii* complex-  
357 *C. auris*, representing chromosome number states of  $N=8$  and  $N=7$ , respectively. We also  
358 hypothesize parallel evolution of the geographical clades of *C. auris*, at different time scales,  
359 diverging from a common ancestor CA3, which was derived from the ancestor CA2. Out of  
360 the four clades, clade 2 has a remarkably rearranged genome. The location of *inCEN* serves  
361 as a useful index for representing interclade differences. The synteny block containing *C.*  
362 *lusitaniae CEN8* is conserved in *C. haemulonii*, *C. pseudohaemulonii*, *C. duobushaemulonii*  
363 as well as in *C. auris* clades 1,3, and 4. The genes in the block are found distributed in two  
364 chromosomes in clade 2, indicating that a break occurred within the block, followed by a  
365 downstream reciprocal translocation event (supplementary table 13, fig. 2B). The terminal  
366 chromosomal translocation (TCT) event in which Chr4 and Chr7 of CA3 exchanged  
367 chromosome ends might have repositioned *inCEN* resulting in a *CICEN5-inCEN*  
368 configuration (fig. 2B, fig. 5B), exclusive to clade 2. This structural change further confirms  
369 the divergence of clade 2 from the common ancestor CA3 along a different evolutionary  
370 trajectory (fig. 5C). On analysing the whole genome synteny conservation, we observed that  
371 clades 1,3, and 4 are closer to *C. duobushaemulonii* (supplementary fig. 5), supporting the  
372 inference that clade 2 is unique. Also, the conservation of the *C. lusitaniae CEN8*-containing  
373 synteny block among the *C. haemulonii* complex species and all the *C. auris* clades except  
374 clade 2 suggests that each of these species is phylogenetically closer to *C. lusitaniae* than  
375 clade 2. These observations are in disagreement with an alternative model of clade 2 being

376 the ancestral unique strain where the event leading to chromosome number reduction  
377 happened in which case clade 2 would have shared higher similarity with *C. lusitaniae*. Other  
378 rearrangements causing *CEN* relocations provide additional lines of evidence for the clade-  
379 specific divergence.

380 The inferred genomes can serve as references to trace *CEN*-associated rearrangements  
381 in other related species of the *Clavispora/Candida* clade. Other *CEN*-associated structural  
382 changes observed between *C. lusitaniae* and *C. auris* have an uneven distribution across the  
383 member species, indicating that *C. intermedia*, *C. blattae*, and *C. oregonensis* are likely to be  
384 transitional species connecting the two immediate common ancestors (supplementary table  
385 14).

386

## 387 **Discussion**

388 Centromere identification revealed a typical centromere landscape in multiple species  
389 of the *Clavispora/Candida* clade - small regional *CENs* constituted by AT-rich unique  
390 sequences and embedded in ORF-free regions that are devoid of any detectable pericentric  
391 heterochromatin, DNA motifs or repeats. These closely related species either contain seven  
392 chromosomes or eight chromosomes. We propose that a centromere inactivation event in a  
393 common ancestor with eight chromosomes led to this diversity. The inactive centromere, in a  
394 pseudo-dicentric chromosome that might have formed at an intermediate stage, underwent  
395 substantial but differential attrition of centromere DNA sequence. This process might have  
396 played a crucial role in the emergence of multiple species with seven chromosomes.  
397 Inactivation of centromere function mediated by DNA sequence has been suggested  
398 previously (Jäger & Philippsen 1989; Gordon et al. 2011; Lhuillier-Akakpo et al. 2015).  
399 Several synteny breakpoints mapped to the identified centromeres, when compared with  
400 representative species of the eight-chromosome state, add to the growing evidence that  
401 suggests centromeres as a hub of fragility (Simi et al. 1998; Kim et al. 2013) and downstream  
402 chromosomal rearrangements. Spatial proximity of clustered centromeres in fungal species  
403 with homogenized centromere DNA sequences facilitates intercentromeric recombination,  
404 possibly mediated by replication fork stalling and higher chances of double-stranded breaks,  
405 thus contributing towards karyotype evolution (Greenfeder & Newlon 1992; Aze et al. 2016;  
406 Guin, Chen, et al. 2020). The role of AT-rich sequences and poly (A) stretches in these  
407 events, owing to their melting features and potential propensity to form non-B DNA,  
408 warrants further study as centromeres in many fungal species coincide with GC- or GC-3

409 troughs (Zhang & Freudenreich 2007; Lynch et al. 2010; Navarro-Mendoza et al. 2019;  
410 Yadav et al. 2019; Sankaranarayanan et al. 2020; Talbert & Henikoff 2020).

411 Whole chromosome and segmental aneuploidy are correlated with drug resistance in  
412 other fungal pathogens (Kwon-Chung & Chang 2012). The *C. auris* genome is known to be  
413 highly plastic (Bravo Ruiz et al. 2019). Mapping of centromere loci should help trace  
414 genomic rearrangement events that possibly contribute to drug resistance or virulence in  
415 different clinical isolates. Centromere sequences in different geographical clades were found  
416 to evolve rapidly and differentially than the rest of the genome, suggesting that centromeres  
417 are potential candidate loci to study evolutionary trajectories emerging within a species. *C.*  
418 *auris* clade 2 has the most rearranged genome and consists of atypical isolates that differ  
419 from the other clades in terms of drug tolerance as well as pathogenicity (Iguchi et al. 2019;  
420 Muñoz et al. 2019; Sekizuka et al. 2019). The unique nature of centromere sequences can be  
421 used for accurate species-level and clade-level identification.

422 In this study, we reveal that the genome of clade 2 differs from the rest of the clades in the  
423 position of orthologous centromeres on the chromosomes and the location of the inactive  
424 centromere. Chromosome-level comparisons also reveal that clade 2 is more diverged from  
425 *C. duobushaemulonii* than the other clades. These observations directed us to conclude that  
426 *C. auris* clades diverged from a common ancestor that shares ancestry with the *C. haemulonii*  
427 complex species, and from which clade 2 diverged along a different trajectory during the  
428 parallel evolution of the geographical clades. Drastic karyotype alterations, evident from the  
429 centromere and inactive centromere locations are likely to have contributed to the  
430 distinctiveness of *C. auris* clade2, compared to other clades and the *C. haemulonii* complex  
431 species. Ascomycetous pathogens like *C. albicans* and *C. glabrata* exist as clades that exhibit  
432 geographical specificity and clade-specific phenotypic features (Dodgson et al. 2003; Soll &  
433 Pujol 2003). Rare or no interclade recombination is observed in these species, and little is  
434 known about the genomic rearrangements or the variations at centromeres operating at the  
435 clade-level, which can, in turn, affect the recombination frequency.

436 We conjecture that such centromere-associated clade-specific differences might not  
437 be restricted to *C. auris*. Further exploration of centromere sequences and associated  
438 structural changes within a species and species complexes will yield deeper insight into the  
439 role of centromeres in generating diversity in primarily asexual fungi.

440

## 441 **Materials and Methods**

442 **Strains, media, and growth conditions.** Strains of various *Candida* species used in the  
443 study (listed in supplementary table 1) were grown in YPD (1% Yeast Extract, 2% Peptone,  
444 and 2% Dextrose) at 30 °C. The identity of the strains was confirmed by amplification and  
445 sequencing of the internal transcribed spacer (ITS) and D1/D2 regions, followed by BLAST  
446 analysis (<http://www.ncbi.nlm.nih.gov/BLAST/Blast.cgi>). The clade-status of different *C.*  
447 *auris* isolates used was confirmed by amplifying and sequencing regions of three  
448 housekeeping genes (*TUB2*, *EFB1*, and *RPB1*) harbouring polymorphic sites (supplementary  
449 table 2).

450 **Construction of *C. auris* strain expressing CENP-A<sup>Cse4</sup>- Protein A fusion protein.** The  
451 homolog of CENP-A<sup>Cse4</sup> in *C. auris* was identified by BLAST using *C. albicans* CENP-A<sup>Cse4</sup>  
452 sequence as the query against the *C. auris* genome. It was distinguished from the canonical  
453 histone H3 sequences by confirming the presence of CENP-A<sup>Cse4</sup> - specific amino acid  
454 residues (Keith et al. 1999). For tagging CENP-A<sup>Cse4</sup> with Protein A at the C-terminus,  
455 approximately 900 bp and 800 bp were used as upstream and downstream sequences,  
456 respectively to construct the tagging cassette. The 900 bp fragment (including the complete  
457 ORF and native promoter sequence) was amplified from the genomic DNA and cloned as a  
458 *KpnI-SacI* fragment in the pBS-TAP-NAT plasmid. The downstream sequence was cloned as  
459 a *SpeI-NotI* fragment. The 3.7 kb tagging construct, as a *KpnI-NotI* fragment, was used to  
460 transform Cau46R. The transformation of the strains was performed as previously  
461 described (Sanyal et al. 2004). Nourseothricin (Jena Bioscience) was added at a concentration  
462 of 100 µg/ml in the media for selecting transformants. The colonies obtained were  
463 subcultured in presence of nourseothricin and integration of the tagging construct in NAT<sup>+</sup>  
464 transformants was confirmed by PCR.

465 **Western Blotting.** Cells were grown overnight in YPD till mid-log phase, and 3 OD  
466 equivalent cells were harvested for protein lysate preparation. The cells were suspended in  
467 400 µL of ice-cold trichloroacetic acid (12.5%), vortexed briefly, and stored at -20°C  
468 overnight. The samples were later thawed and pelleted by centrifugation at 14,000 rpm at 4  
469 °C for 10 min. The pellets were washed twice with 400 µL of ice-cold acetone (80%), air-  
470 dried, suspended in an appropriate volume of lysis buffer (0.1 M NaOH and 1% SDS), and  
471 boiled for 10 min. The proteins in the lysate were separated on 12% polyacrylamide gels. The  
472 separated samples were transferred onto nitrocellulose membranes, which were then probed



473 with anti-Protein A antibodies (Sigma, Cat No: P3775, 1:5000 dilution in 2.5% skim milk  
474 powder (w/v in 1x PBS)) and HRP-conjugated goat anti-rabbit secondary antibodies (Abcam,  
475 1:10000 dilution in 2.5% skim milk powder (w/v in 1x PBS)). The blots were developed  
476 using Chemiluminescence Ultra Substrate (Biorad) and imaged using the VersaDoc system  
477 (Biorad).

478 **Preparation of spheroplasts.** Cells were grown in 50 ml YPD till  $OD_{600} = 0.8$  and washed  
479 with water by centrifugation at 3000 rpm for 5 min. Cells were then incubated in 10 mL of 2-  
480 mercaptoethanol solution (5% in water, Himedia, Cat No. MB041) for 1 h at 30°C at 180  
481 rpm. The cells were pelleted, washed, and resuspended in SCE buffer (1M sorbitol, 100 mM  
482 sodium citrate, 10 mM EDTA at pH 8.0). Lysing enzyme from *Trichoderma harzianum*  
483 (Sigma, Cat No. L1412) was added at a concentration of 2.5 mg/ml, and the suspension was  
484 incubated at 37°C at 80 rpm for 2 h. The cells were examined under a microscope to  
485 determine the proportion of spheroplasts in the suspension. The prepared spheroplasts were  
486 further processed based on the corresponding experimental design.

487 **Indirect Immunofluorescence.** *C. auris* CENP-A<sup>Cse4</sup>- Protein-A strain was inoculated to 1%  
488 (v/v) from an overnight culture and was grown till  $OD_{600} = 0.8$ . The cells were fixed by  
489 adding formaldehyde to a final concentration of 1% for 15 min. Spheroplasts were prepared  
490 from the fixed cells (as described above), washed with 1x PBS, and diluted in 1x PBS to a  
491 density appropriate for microscopy. Slides for microscopy were washed and coated with poly  
492 L-lysine (10 mg/mL). Twenty microlitres of the diluted cell suspension were added onto  
493 slides and incubated at room temperature for 5 min. The suspension was aspirated, and the  
494 slide was washed to remove unbound spheroplasts. The slide was treated with ice-cold  
495 methanol for 6 min, followed by ice-cold acetone for 30 sec. Blocking solution (2% non-fat  
496 skim milk powder in 1x PBS) was added to each well, and the slide was incubated for 30 min  
497 at room temperature. The blocking solution was aspirated, and rabbit anti-Protein A  
498 antibodies (Sigma, Cat No. P3775, dilution 1:1000) were added. The slide was incubated in a  
499 wet chamber for 1 h. The antibodies were aspirated, and the slide was washed 15 times,  
500 incubating the slide for 2 min for each wash. Secondary antibodies were added (Alexa flour  
501 568 goat anti-rabbit IgG, Invitrogen, Cat No. A11011, dilution 1:1000). The slide was  
502 incubated in the dark in a wet chamber for 1 h at room temperature. The washes were  
503 repeated, and the mounting medium (70% glycerol with 100 ng/ml DAPI) was added. Clean  
504 coverslips were mounted onto the wells, and the slides were imaged using an inverted

505 fluorescence microscope (Zeiss Axio observer, Plan Apochromat, 100X oil). Images were  
506 processed using Zeiss ZEN system software and ImageJ.

507 **Chromatin immunoprecipitation (ChIP).** *C. auris* CENP-A<sup>Cse4</sup>- Protein-A strain was  
508 inoculated to 1% (v/v) from an overnight culture, grown till OD<sub>600</sub> = 1.0 and crosslinked by  
509 the addition of formaldehyde to a final concentration of 1% for 15 min. Quenching with  
510 0.135 mM Glycine for 5 min was followed by preparation of spheroplasts (as described  
511 above). Following buffers were used to wash the prepared spheroplasts: 1x PBS (ice-cold),  
512 Buffer-1 (0.25% Triton X-100, 10 mM EDTA, 0.5 mM EGTA, 10 mM Na-HEPES at pH  
513 6.5), and Buffer-2 (200 mM NaCl, 1 mM EDTA, 0.5 mM EGTA, 10 mM Na-HEPES at pH  
514 6.5). One mL lysis buffer (50 mM HEPES at pH 7.4, 1% Triton X-100, 140 mM NaCl, 0.1%  
515 Na-deoxycholate, 1 mM EDTA) was added to the pellet obtained after the final wash, along  
516 with Protease inhibitor cocktail (1x). The resuspended spheroplasts were sonicated to obtain  
517 chromatin fragments in the size range of 100-400 bp. The lysate was cleared by  
518 centrifugation at 14,000 rpm for 10 min at 4 °C. One-tenth of the lysate volume was separated  
519 to be used as the input DNA. The remaining lysate was divided into two equal fractions:  
520 Anti- Protein-A antibodies were added to one of the fractions (IP fraction) at a 20 µg/mL  
521 concentration. The other fraction served as the antibody-minus control. Both the fractions  
522 were incubated overnight on a rotaspin at 4 °C. Protein-A Sepharose beads were added, and  
523 the samples were incubated on a rotaspin at 4 °C for 6 h. This was followed by collecting the  
524 beads by centrifugation and sequential washes with the following buffers: twice with 1 mL  
525 low salt wash buffer (0.1% SDS, 1% Triton X-100, 2 mM EDTA, 20 mM Tris at pH 8.0, 150  
526 mM NaCl), twice with 1 mL high salt wash buffer (0.1% SDS, 1% Triton X-100, 2 mM  
527 EDTA, 20 mM Tris at pH 8.0, 500 mM NaCl), once with 1 mL LiCl wash buffer (0.25 M  
528 LiCl, 1% NP-40, 1% Na-deoxycholate, 1 mM EDTA, 10 mM Tris at pH 8.0) and twice with  
529 1 mL 1x TE (10 mM Tris at pH 8.0, 1 mM EDTA). For each wash, the beads were rotated on  
530 a rotaspin for 5 min in the corresponding buffer, followed by centrifugation at 5400 rpm for 2  
531 min. The beads were suspended in 0.25 mL of elution buffer (0.1 M NaHCO<sub>3</sub>, 1% SDS),  
532 incubated at 65 °C for 5 min, and rotated on the rotaspin for 15 min. The supernatant was  
533 collected after centrifugation. The elution step was repeated to obtain a final eluted volume of  
534 0.5 mL. The elution buffer was also added to the stored input sample to obtain a final volume  
535 of 0.5 mL. Decrosslinking of the three samples (input, IP, and antibody-minus) was done by  
536 adding 20 µL of 5 M NaCl and overnight incubation at 65 °C. Proteins in the samples were  
537 removed by adding 10 µL 0.5 M EDTA, 20 µL 1 M Tris at pH 6.8, 2 µL Proteinase K (20

538 mg/L) and incubating at 45°C for 3 h. An equal volume of phenol-chloroform-isoamyl  
539 alcohol (25:24:1) was added for purifying the samples, and the aqueous phase was extracted  
540 by centrifugation at 14,000 rpm for 10 min. DNA was precipitated by adding 3 M Na-acetate  
541 (1/10th of the volume, pH 5.2), 1 µL glycogen (20 mg/mL), and 1 mL absolute ethanol,  
542 followed by incubation at -20°C overnight. The precipitated DNA was collected by  
543 centrifugation at 13,000 rpm for 30 min at 4°C and was washed once with 70% ethanol. Air-  
544 dried pellets were resuspended in 20 µL sterile MilliQ water with 10 mg/mL RNase. ChIP-  
545 DNA from duplicates were pooled for ChIP-seq.

546 The same protocol was followed to determine canonical histone H3 and histone H4  
547 occupancy at the centromeres in *C. haemulonii*, *C. duobushaemulonii*, *C. pseudohaemulonii*,  
548 and different clades of *C. auris*, with some differences. Anti-H3 antibodies (Abcam [ab1791],  
549 at a final concentration of 13 µg/mL), and anti-H4 antibodies (Abcam [ab10158], at a final  
550 concentration of 13 µg/mL) were used for immunoprecipitation. The bead washes were done  
551 for 15 min.

552 **ChIP-seq. Library preparation:** ChIP DNA obtained from CENP-A<sup>Cse4</sup>-Protein-A (4 ng) was  
553 used to generate a sequencing library using NEBNext® Ultra™ II DNA Library Prep Kit for  
554 Illumina (Cat No. E7645S). In brief, the fragmented DNA was subjected to end repair  
555 followed by A – tailing and adapter ligation. The product DNA was enriched by PCR  
556 amplification using Illumina index adapter primers. The amplified product was purified using  
557 Ampure beads to remove unused primers. The library was quantitated using Qubit DNA High  
558 Sensitivity quantitation assay, and library quality was checked on Bioanalyzer 2100 using  
559 Agilent 7500 DNA Kit.

560 *Data analysis:* ChIP-sequencing yielded 20816547 reads for the input, and 20959149 reads  
561 for IP. Based on the FastQC (v0.11.8) report, adaptor sequences and orphan reads were  
562 removed using Trim Galore! (v0.4.4) (<http://www.bioinformatics.babraham.ac.uk/projects/>).  
563 The output file was mapped onto the GenBank reference assembly for *C. auris* clade 1  
564 (GCA\_002759435.2) to obtain the sequence alignment map in SAM format. Conversion to  
565 BAM, sorting, and indexing was achieved using SAMtools (v1.9)(Li et al. 2009).  
566 Identification and excision of duplicates were made using MarkDuplicates scripted by Picard  
567 tools (v1.119) (<http://broadinstitute.github.io/picard/>). The processed binary alignment map  
568 was used as input for MACS2 (v2.1.1) (Zhang et al. 2008) along with the genome control  
569 reads (processed in the same way as the immunoprecipitation sample) to generate peaks. The

570 peaks were then sorted based on p-value, FDR value, and fold change. The peaks were  
571 visualized using Integrative Genomic Viewer (v2.4.1) (James T Robinson et al. 2011).  
572 Enrichment peaks were curated (fold enrichment  $\geq 2.6$ ), and the coordinates of the peaks  
573 obtained from MACS2 post-peak calling was used to extract sequences from the genome  
574 assemblies. The extracted sequences were scanned for repeats using SyMap (v4.2)  
575 (Soderlund et al. 2011), and the result was depicted as a dot plot.

576 **ChIP-qPCR analysis.** Real-time PCR was used to confirm CENP-A<sup>Cse4</sup> enrichment and H3  
577 depletion in the centromere sequences, using primers specific to centromeres and non-  
578 centromeric loci (listed in supplementary table 3) and SensiFAST SYBR No ROX Kit. 1:50  
579 dilutions for input and 1:20 dilutions of the IP were used for determining CENP-A<sup>Cse4</sup>  
580 enrichment. 1:50 dilutions for input and 1:5 dilutions of the IP were used for determining  
581 histone H3 and H4 occupancy. The program used: 94°C for 2 min, 94°C for 30 sec,  
582 appropriate T<sub>m</sub> for 30 sec, 72°C for 30 sec for 30 cycles. The adjusted Ct values (log<sub>2</sub> of  
583 dilution factor subtracted from the Ct value of the input or IP) were used to calculate the  
584 percentage input using the formula:  $100 \cdot 2^{(\text{adjusted Ct of input} - \text{adjusted Ct of IP})}$ . Three  
585 technical replicates were taken for the assay, and the standard error of the mean was  
586 calculated. The plots were generated using GraphPad Prism 8.

587 **Ortholog search and Phylogenetic tree construction:** Available annotation files for *S.*  
588 *cerevisiae* (GCF\_000146045.2), *C. glabrata* (GCF\_000002545.3), *C. albicans*  
589 (GCF\_000182965.3), *C. tropicalis* (GCF\_000006335.3), *C. dubliniensis*  
590 (GCF\_000026945.1), *C. parapsilosis* (GCA\_000182765.2), *D. hansenii*  
591 (GCF\_000006445.2), *S. stipitis* (GCF\_000209165.1), *C. neoformans* (GCF\_000091045.1) ,  
592 *C. auris clade 1* (GCA\_002759435.2), *C. auris clade 2* (GCA\_003013715.2), *C. auris clade*  
593 *4* (GCA\_008275145.1), *C. duobushaemulonii* (GCF\_002926085.2), *C. haemulonii*  
594 (GCF\_002926055.2), *C. pseudohaemulonii* (GCF\_003013735.1), *C. lusitaniae*  
595 (GCF\_000003835.1), and *C. intermedia* (GCA\_900106115.1) were downloaded from  
596 GenBank. Transcription and proteome data of *C. lusitaniae* were used to annotate the *C.*  
597 *fructus* (GCA\_003707795.1) genome. *C. auris clade 3* (GCA\_005234155.1), *C. heveicola*  
598 (GCA\_003708405.1), *C. oregonensis* (GCA\_003707785.2), and *C. blattae*  
599 (GCA\_003706955.2) genome assemblies were annotated using transcriptome and proteome  
600 data of *C. auris clade 2*, using MAKER (v2.31.10) (Holt & Yandell 2011). For all given  
601 species, clusters of orthologous proteins were identified using OrthoMCL (v2.0.9) (Li et al.  
602 2003). The single-copy orthologs present in all the species were identified and aligned using

603 Clustal Omega (v1.2.4) (Sievers et al. 2011). All the alignments were concatenated for each  
604 species, including the gaps. The gaps and corresponding sequences in all other species were  
605 removed. MrBayes (v2.3.5) (Ronquist & Huelsenbeck 2003) was used for tree construction,  
606 which was visualized using FigTree (v1.4.4) (<http://tree.bio.ed.ac.uk/software/figtree/>).  
607 Orthologs for proteins involved in heterochromatin formation and RNAi was done using  
608 phmmer option in HMMER (EMBL-EBI) (Potter et al. 2018).

609 ***In silico* analyses:** *Gene synteny*: Centromere prediction in a candidate species was made by  
610 aligning the respective genome assembly to the reference species assembly using Mauve  
611 (Geneious v11.1.4) (Biomatters Ltd.), and the conserved synteny blocks corresponding to the  
612 ORFs flanking centromeres in the reference assembly were identified. For confirming  
613 synteny conservation, candidate species-specific local genome databases were created using  
614 Geneious. Blast analysis of five individual ORFs on either side of the centromeres in the  
615 reference species assembly was performed against the local genome database of the candidate  
616 species, using the protein sequences as queries. For genome-level comparison, coordinates of  
617 all the synteny blocks conserved between two species were obtained using SyMap (v4.2), and  
618 the circos plots were drawn using Circos (0.69-8) (Krzywinski et al. 2009). Scaffold-level  
619 and ORF-level synteny analyses identifying rearrangements were done using Easyfig (v2.2.2)  
620 (Sullivan et al. 2011).

621 *Centromere sequence features*: Python scripts were written to determine the GC% at the third  
622 position of codons. The percentage of G and C at the third position of codons (except the stop  
623 codons) was calculated, followed by calculating the average values in a sliding window of 10  
624 ORFs. These values were plotted for each scaffold of the genome. Annotations that are not a  
625 multiple of three were not considered for the analysis. GC% was also calculated for the whole  
626 scaffolds with a window size of 5 kb and a sliding step of 1 kb. GC skew  $((G - C) / (G + C))$   
627 and AT skew  $((A - T) / (A + T))$  were plotted for a region of 10 kb flanking the  
628 centromeres using a window size of 100 bp and a sliding step of 1 bp. The skew calculation  
629 was done in Julia (v1.2.0), and the plotting was done in R. The "geom\_smooth" function with  
630 "gam" method in ggplot2 (Wickham 2009) was used to smoothen the curve.

631 To study trends in centromere sequence evolution in different clades of *C. auris*, protein  
632 sequences were extracted using `agat_sp_extract_sequences.pl` from the AGAT suite  
633 (<https://github.com/NBISweden/AGAT>), and orthologous genes found using `rsd_search`  
634 (Wall et al. 2003). Intergenic sequence that occurred between the same pair of orthologous



635 genes in pairs were identified as orthologous intergenic sequence and aligned using FSA  
636 (Bradley et al. 2009), which we previously found to have high specificity for true homology  
637 in aligning intergenic DNA sequence (Jayaraman & Siddharthan 2010). In each of the  
638 pairwise alignments generated by FSA, the mutation rate was estimated as  
639  $\frac{\#mutations}{\#matches}$ , where  $\#matches$  = number of positions where an aligned pair of  
640 nucleotides is reported; and  $\#mutations$  = number of match positions where the alignment is a  
641 mismatch. The mean and sample standard deviation over all intergenic sequences were  
642 calculated and compared to the observed numbers in centromeres.

643 If available, the respective genome assembly annotation files were used to report the length  
644 of ORF-free regions. Otherwise, all predicted ORFs larger than 600 bp were considered as  
645 coding sequences. Motif search was done using MEME in the MEME Suite (Bailey et al.  
646 2009).

647 *Gene expression:* For determining the transcriptional status of centromeres, the raw  
648 sequencing reads (SRR6900290, SRR6900291, SRR6900292, SRR6900293) were aligned to  
649 the reference genome of clade 1 (GenBank assembly GCA\_002759435.2) using HISAT2  
650 (v2.1.0) (Kim et al. 2019). The aligned reads were then graphically visualized in the IGV to  
651 analyse gene expression levels at/around the centromeres on different chromosomes. For  
652 studying the transcriptional status of ORFs overlapping with or flanking the centromeres, the  
653 abundance of annotated transcripts was quantified using pseudo alignment program kallisto  
654 (v0.46.1) (Bray et al. 2016). The expression of genes around/ overlapping the centromere in  
655 TPM (transcripts per million) were compared to the global gene expression level.

## 656 **Data availability**

657 ChIP-sequencing data have been deposited in NCBI under BioProject PRJNA612018.

## 658 **Acknowledgements**

659

660 We thank N. Chauhan for providing the strains, V. Yadav for preliminary gene synteny  
661 analyses, L. Sreekumar for reagents, and Clevergene Biocorp Pvt. Ltd., Bengaluru for  
662 generating ChIP-sequencing data. This study was funded by the Indian Council of Medical  
663 Research (AMR/149/2018-ECD-II), Government of India, to K.S., A.C., M.S., and R.P. K.S.  
664 acknowledges the financial support of JC Bose National Fellowship (Science and  
665 Engineering Research Board, Govt. of India, JCB/2020/000021) and intramural funding from  
666 JNCASR. A.N. was a National Postdoctoral Fellow (PDF/2016/003256), supported by the



667 Science and Engineering Research Board (SERB), Department of Science and Technology  
668 (DST), Government of India. R.N.V, P.S, and R.S. acknowledge Department of Atomic  
669 Energy, Government of India for funding and the computing facilities provided by The  
670 Institute of Mathematical Sciences.

671

## 672 **References**

673 Alper BJ, Job G, Yadav RK, Shanker S, Lowe BR, Partridge JF. 2013. Sir2 is required for  
674 Ctr4 to initiate centromeric heterochromatin assembly in fission yeast. *EMBO J*.  
675 32(17):2321–2335.

676 Aze A, Sannino V, Soffientini P, Bachi A, Costanzo V. 2016. Centromeric DNA replication  
677 reconstitution reveals DNA loops and ATR checkpoint suppression. *Nat Cell Biol*.  
678 18(6):684–691.

679 Bailey TL, Boden M, Buske FA, Frith M, Grant CE, Clementi L, Ren J, Li WW, Noble WS.  
680 2009. MEME Suite: Tools for motif discovery and searching. *Nucleic Acids Res*. 37(SUPPL.  
681 2):202–208.

682 Bradley RK, Roberts A, Smoot M, Juvekar S, Do J, Dewey C, Holmes I, Pachter L. 2009.  
683 Fast statistical alignment. *PLoS Comput Biol*. 5(5).

684 Bravo Ruiz G, Ross ZK, Holmes E, Schelenz S, Gow NAR, Lorenz A. 2019. Rapid and  
685 extensive karyotype diversification in haploid clinical *Candida auris* isolates. *Curr Genet*.  
686 65(5):1217–1228.

687 Bray NL, Pimentel H, Melsted P, Pachter L. 2016. Near-optimal probabilistic RNA-seq  
688 quantification. *Nat Biotechnol*. 34(5):525–527.

689 Bühler M, Moazed D. 2007. Transcription and RNAi in heterochromatic gene silencing. *Nat*  
690 *Struct Mol Biol*. 14(11):1041–1048.

691 Cadnum JL, Shaikh AA, Piedrahita CT, Sankar T, Jencson AL, Larkin EL, Ghannoum MA,  
692 Donskey CJ. 2017. Effectiveness of disinfectants against *Candida auris* and other candida  
693 species. *Infect Control Hosp Epidemiol*. 38(10):1240–1243.

694 Casadevall A, Kontoyiannis DP, Robert V. 2019. On the Emergence of *Candida auris* :  
695 climate change, azoles, swamps, and birds . *mBio*. 10(4):1–7.

- 696 de Cássia Orlandi Sardi J, Silva DR, Soares Mendes-Giannini MJ, Rosalen PL. 2018.  
697 *Candida auris*: Epidemiology, risk factors, virulence, resistance, and therapeutic options.  
698 *Microb Pathog.* 125:116–121.
- 699 Chatterjee G, Sankaranarayanan SR, Guin K, Thattikota Y, Padmanabhan S, Siddharthan R,  
700 Sanyal K. 2016. Repeat-associated fission yeast-like regional centromeres in the  
701 ascomycetous budding yeast *Candida tropicalis*. *PLoS Genet.* 12(2):1–28.
- 702 Chow NA, de Groot T, Badali H, Abastabar M, Chiller TM, Meis JF. 2019. Potential Fifth  
703 Clade of *Candida auris*, Iran, 2018 . *Emerg Infect Dis.* 25(9):1780–1781.
- 704 Chowdhary A, Prakash A, Sharma C, Kordalewska M, Kumar A, Sarma S, Tarai B, Singh A,  
705 Upadhyaya G, Upadhyay S, et al. 2018. A multicentre study of antifungal susceptibility  
706 patterns among 350 *Candida auris* isolates (2009-17) in India: Role of the ERG11 and FKS1  
707 genes in azole and echinocandin resistance. *J Antimicrob Chemother.* 73(4):891–899.
- 708 Daniel HM, Lachance MA, Kurtzman CP. 2014. On the reclassification of species assigned  
709 to *Candida* and other anamorphic ascomycetous yeast genera based on phylogenetic  
710 circumscription. *Antonie van Leeuwenhoek, Int J Gen Mol Microbiol.* 106(1):67–84.
- 711 Dodgson AR, Pujol C, Denning DW, Soll DR, Fox AJ. 2003. Multilocus Sequence Typing of  
712 *Candida glabrata* Reveals Geographically Enriched Clades. *J Clin Microbiol.* 41(12):5709–  
713 5717.
- 714 Drinnenberg IA, Weinberg DE, Xie KT, Mower JP, Wolfe KH, Fink GR, Bartel DP. 2009.  
715 RNAi in budding yeast. *Science.* 326(5952):544–550.
- 716 Emara M, Ahmad S, Khan Z, Joseph L, Al-obaid I, Purohit P, Bafna R. 2015. *Candida auris*  
717 candidemia in Kuwait, 2014. *Emerg Infect Dis.* 21(6):1091–1092.
- 718 Fang Y, Coelho MA, Shu H, Schotanus K, Thimmappa BC, Yadav V, Chen H, Malc EP,  
719 Wang J, Mieczkowski PA, et al. 2020. Long transposon-rich centromeres in an oomycete  
720 reveal divergence of centromere features in Stramenopila-Alveolata-Rhizaria lineages. *PLoS*  
721 *Genet.* 16(3):1–30.
- 722 Gabaldón T, Naranjo-Ortíz MA, Marcet-Houben M. 2016. Evolutionary genomics of yeast  
723 pathogens in the Saccharomycotina. *FEMS Yeast Res.* 16(6):1–10.
- 724 Gordon JL, Byrne KP, Wolfe KH. 2011. Mechanisms of chromosome number evolution in  
725 yeast. *PLoS Genet.* 7(7):0–3.

- 726 Greenfeder SA, Newlon CS. 1992. Replication forks pause at yeast centromeres. *Mol Cell*  
727 *Biol.* 12(9):4056–4066.
- 728 Guin K, Chen Y, Mishra R, Muzaki SRBM, Thimmappa BC, O’Brien CE, Butler G, Sanyal  
729 A, Sanyal K. 2020. Spatial inter-centromeric interactions facilitated the emergence of  
730 evolutionary new centromeres. *elife.* 9:1–28.
- 731 Guin K, Sreekumar L, Sanyal K. 2020. Implications of the evolutionary trajectory of  
732 centromeres in the fungal kingdom. *Annu Rev Microbiol.* 74:835–853.
- 733 Hickman MA, Froyd CA, Rusche LN. 2011. Reinventing heterochromatin in budding yeasts:  
734 Sir2 and the origin recognition complex take center stage. *Eukaryot Cell.* 10(9):1183–1192.
- 735 Holt C, Yandell M. 2011. MAKER2: An annotation pipeline and genome-database  
736 management tool for second-generation genome projects. *BMC Bioinformatics.* 12(1).
- 737 Iguchi S, Itakura Y, Yoshida A, Kamada K, Mizushima R, Arai Y, Uzawa Y, Kikuchi K.  
738 2019. *Candida auris*: A pathogen difficult to identify, treat, and eradicate and its  
739 characteristics in Japanese strains. *J Infect Chemother.* 25(10):743–749.
- 740 Jackson BR, Chow N, Forsberg K, Litvintseva AP, Lockhart SR, Welsh R, Vallabhaneni S,  
741 Chiller T. 2019. On the origins of a species: What might explain the rise of *Candida auris*? *J*  
742 *Fungi.* 5(3):58.
- 743 Jäger D, Philippsen P. 1989. Stabilization of dicentric chromosomes in *Saccharomyces*  
744 *cerevisiae* by telomere addition to broken ends or by centromere deletion. *EMBO J.*  
745 8(1):247–254.
- 746 James T Robinson, Thorvaldsdóttir H, Winckler W, Guttman M, Lander ES, Getz G, Mesirov  
747 JP. 2011. Integrative genomics viewer. *Nat Biotechnol.* 29(1):24–26.
- 748 Jayaraman G, Siddharthan R. 2010. Sigma-2: Multiple sequence alignment of non-coding  
749 DNA via an evolutionary model. *BMC Bioinformatics.* 11:1–13.
- 750 Kapoor S, Zhu L, Froyd C, Liu T, Rusche LN, Rine J. 2015. Regional centromeres in the  
751 yeast *Candida lusitanae* lack pericentromeric heterochromatin. *Proc Natl Acad Sci U S A.*  
752 112(39):12139–12144.
- 753 Keith KC, Baker RE, Chen Y, Harris K, Stoler S, Fitzgerald-Hayes M. 1999. Analysis of  
754 primary structural determinants that distinguish the centromere-specific function of histone

- 755 variant Cse4p from histone H3. *Mol Cell Biol.* 19(9):6130–6139.
- 756 Kim D, Paggi JM, Park C, Bennett C, Salzberg SL. 2019. Graph-based genome alignment  
757 and genotyping with HISAT2 and HISAT-genotype. *Nat Biotechnol.* 37(8):907–915.
- 758 Kim TM, Xi R, Luquette LJ, Park RW, Johnson MD, Park PJ. 2013. Functional genomic  
759 analysis of chromosomal aberrations in a compendium of 8000 cancer genomes. *Genome*  
760 *Res.* 23(2):217–227.
- 761 Krzywinski M, Schein J, Birol I, Connors J, Gascoyne R, Horsman D, Jones SJ, Marra MA.  
762 2009. Circos: An information aesthetic for comparative genomics. *Genome Res.* 19(9):1639–  
763 1645.
- 764 Kwon-Chung KJ, Chang YC. 2012. Aneuploidy and Drug Resistance in Pathogenic Fungi.  
765 *PLoS Pathog.* 8(11):8–11.
- 766 Legrand M, Jaitly P, Feri A, d’Enfert C, Sanyal K. 2019. *Candida albicans*: An emerging  
767 yeast model to study eukaryotic genome plasticity. *Trends Genet.* 35(4):292–307.
- 768 Lhuillier-Akakpo M, Guérin F, Frapporti A, Duharcourt S. 2015. DNA deletion as a  
769 mechanism for developmentally programmed centromere loss. *Nucleic Acids Res.*  
770 44(4):1553–1565.
- 771 Li H, Handsaker B, Wysoker A, Fennell T, Ruan J, Homer N, Marth G, Abecasis G, Durbin  
772 R. 2009. The Sequence Alignment/Map format and SAMtools. *Bioinformatics.* 25(16):2078–  
773 2079.
- 774 Li L, Stoeckert CJJ, Roos DS. 2003. OrthoMCL: Identification of ortholog groups for  
775 eukaryotic genomes. *Genome Res.* 13(9):2178–2189.
- 776 Lockhart SR, Etienne KA, Vallabhaneni S, Farooqi J, Chowdhary A, Govender NP, Colombo  
777 AL, Calvo B, Cuomo CA, Desjardins CA, et al. 2017. Simultaneous emergence of multidrug-  
778 resistant *Candida auris* on 3 continents confirmed by whole-genome sequencing and  
779 epidemiological analyses. *Clin Infect Dis.* 64(2):134–140.
- 780 Lynch DB, Logue ME, Butler G, Wolfe KH. 2010. Chromosomal G + C content evolution in  
781 yeasts: Systematic interspecies differences, and GC-poor troughs at centromeres. *Genome*  
782 *Biol Evol.* 2(1):572–583.
- 783 McKinley KL, Cheeseman IM. 2016. The molecular basis for centromere identity and

- 784 function. *Nat Rev Mol Cell Biol.* 17(1):16–29.
- 785 Morales-López SE, Parra-Giraldo CM, Ceballos-Garzón A, Martínez HP, Rodríguez GJ,  
786 Álvarez-Moreno CA, Rodríguez JY. 2017. Invasive infections with multidrug-resistant yeast  
787 *Candida auris*, Colombia. *Emerg Infect Dis.* 23(1):162–164.
- 788 Muñoz JF, Gade L, Chow NA, Loparev VN, Juieng P, Berkow EL, Farrer RA, Litvintseva  
789 AP, Cuomo CA. 2018. Genomic insights into multidrug-resistance, mating and virulence in  
790 *Candida auris* and related emerging species. *Nat Commun.* 9(1):1–13.
- 791 Muñoz JF, Welsh RM, Shea T, Batra D, Gade L, Anastasia P. 2019. Chromosomal  
792 rearrangements and loss of subtelomeric adhesins linked to clade- specific phenotypes in  
793 *Candida auris*. *bioRxiv*.:754143.
- 794 Navarro-Mendoza MI, Pérez-Arques C, Panchal S, Nicolás FE, Mondo SJ, Ganguly P,  
795 Pangilinan J, Grigoriev I V., Heitman J, Sanyal K, Garre V. 2019. Early diverging fungus  
796 *Mucor circinelloides* lacks centromeric histone CENP-A and displays a mosaic of point and  
797 regional centromeres. *Curr Biol.* 29(22):3791-3802.e6.
- 798 Ola M, O’Brien CE, Coughlan AY, Ma Q, Donovan PD, Wolfe KH, Butler G. 2020.  
799 Polymorphic centromere locations in the pathogenic yeast *Candida parapsilosis*. *Genome*  
800 *Res.* 30(5):684–696.
- 801 Padmanabhan S, Thakur J, Siddharthan R, Sanyal K. 2008. Rapid evolution of Cse4p-rich  
802 centromeric DNA sequences in closely related pathogenic yeasts, *Candida albicans* and  
803 *Candida dubliniensis*. *Proc Natl Acad Sci U S A.* 105(50):19797–19802.
- 804 Poláková S, Blume C, Zárate JÁ, Mentel M, Jørck-Ramberg D, Stenderup J, Piškur J. 2009.  
805 Formation of new chromosomes as a virulence mechanism in yeast *Candida glabrata*. *Proc*  
806 *Natl Acad Sci U S A.* 106(8):2688–2693.
- 807 Potter SC, Luciani A, Eddy SR, Park Y, Lopez R, Finn RD. 2018. HMMER web server: 2018  
808 update. *Nucleic Acids Res.* 46(W1):W200–W204.
- 809 Prakash A, Sharma C, Singh A, Kumar Singh P, Kumar A, Hagen F, Govender NP, Colombo  
810 AL, Meis JF, Chowdhary A. 2016. Evidence of genotypic diversity among *Candida auris*  
811 isolates by multilocus sequence typing, matrix-assisted laser desorption ionization time-of-  
812 flight mass spectrometry and amplified fragment length polymorphism. *Clin Microbiol*  
813 *Infect.* 22(3):277.e1-277.e9.

- 814 Rodriguez JY, Pape P Le, Lopez O, Esquea K, L A, Labiosa4, Alvarez-Moreno C. 2020.  
815 *Candida auris*: a latent threat to critically ill patients with COVID-19. Clin Infect Dis.  
816 ciaa1595.
- 817 Ronquist F, Huelsenbeck JP. 2003. MrBayes 3: Bayesian phylogenetic inference under mixed  
818 models. Bioinformatics. 19(12):1572–1574.
- 819 Ruiz-Gaitán A, Moret AM, Tasiás-Pitarch M, Aleixandre-López AI, Martínez-Morel H,  
820 Calabuig E, Salavert-Lletí M, Ramírez P, López-Hontangas JL, Hagen F, et al. 2018. An  
821 outbreak due to *Candida auris* with prolonged colonisation and candidaemia in a tertiary care  
822 European hospital. Mycoses. 61(7):498–505.
- 823 Sankaranarayanan SR, Ianiri G, Coelho MA, Reza MH, Thimmappa BC, Ganguly P, Vadnala  
824 RN, Sun S, Siddharthan R, Tellgren-Roth C, et al. 2020. Loss of centromere function drives  
825 karyotype evolution in closely related *Malassezia* species. elife. 9:1–33.
- 826 Sanyal K, Baum M, Carbon J. 2004. Centromeric DNA sequences in the pathogenic yeast  
827 *Candida albicans* are all different and unique. Proc Natl Acad Sci U S A. 101(31):11374–  
828 11379.
- 829 Sanyal K, Carbon J. 2002. The CENP-A homolog CaCse4p in the pathogenic yeast *Candida*  
830 *albicans* is a centromere protein essential for chromosome transmission. Proc Natl Acad Sci  
831 U S A. 99(20):12969–12974.
- 832 Satoh K, Makimura K, Hasumi Y, Nishiyama Y, Uchida K, Yamaguchi H. 2009. *Candida*  
833 *auris* sp. nov., a novel ascomycetous yeast isolated from the external ear canal of an inpatient  
834 in a Japanese hospital. Microbiol Immunol. 53(1):41–44.
- 835 Schelenz S, Hagen F, Rhodes JL, Abdolrasouli A, Chowdhary A, Hall A, Ryan L, Shackleton  
836 J, Trimlett R, Meis JF, et al. 2016. First hospital outbreak of the globally emerging *Candida*  
837 *auris* in a European hospital. Antimicrob Resist Infect Control. 5(1):1–7.
- 838 Schotanus K, Heitman J. 2020. Centromere deletion in *Cryptococcus deuterogattii* leads to  
839 neocentromere formation and chromosome fusions. elife. 9:1–26.
- 840 Sekizuka T, Iguchi S, Umeyama T, Inamine Y, Makimura K, Kuroda M, Miyazaki Y,  
841 Kikuchi K. 2019. Clade II *Candida auris* possess genomic structural variations related to an  
842 ancestral strain. PLoS One. 14(10):e0223433.
- 843 Selmecki A, Gerami-Nejad M, Paulson C, Forche A, Berman J. 2008. An isochromosome



- 844 confers drug resistance in vivo by amplification of two genes, *ERG11* and *TAC1*. *Mol*  
845 *Microbiol.* 68(3):624–641.
- 846 Sievers F, Wilm A, Dineen D, Gibson TJ, Karplus K, Li W, Lopez R, McWilliam H,  
847 Remmert M, Söding J, et al. 2011. Fast, scalable generation of high-quality protein multiple  
848 sequence alignments using Clustal Omega. *Mol Syst Biol.* 7(539).
- 849 Simi S, Simili M, Bonatti S, Campagna M, Abbondandolo A. 1998. Fragile sites at the  
850 centromere of Chinese hamster chromosomes: A possible mechanism of chromosome loss.  
851 *Mutat Res - Fundam Mol Mech Mutagen.* 397(2):239–246.
- 852 Soderlund C, Bomhoff M, Nelson WM. 2011. SyMAP v3.4: A turnkey synteny system with  
853 application to plant genomes. *Nucleic Acids Res.* 39(10).
- 854 Soll DR, Pujol C. 2003. *Candida albicans* clades. *FEMS Immunol Med Microbiol.* 39(1):1–  
855 7.
- 856 Sullivan MJ, Petty NK, Beatson SA. 2011. Easyfig: A genome comparison visualizer.  
857 *Bioinformatics.* 27(7):1009–1010.
- 858 Sun S, Yadav V, Billmyre RB, Cuomo CA, Nowrousian M, Wang L, Souciet JL, Boekhout  
859 T, Porcel B, Wincker P, et al. 2017. Fungal genome and mating system transitions facilitated  
860 by chromosomal translocations involving intercentromeric recombination. *PLoS Biol.* 15(8):  
861 e2002527.
- 862 Talbert PB, Henikoff S. 2020. What makes a centromere? *Exp Cell Res.* 389(2):111895.
- 863 Vallabhaneni S, Kallen A, Tsay S, Chow N, Welsh R, Kerins J, Kemble SK, Pacilli M, Black  
864 SR, Landon E, et al. 2017. Investigation of the first seven reported cases of *Candida auris*, a  
865 globally emerging invasive, multidrug-resistant fungus—United States, May 2013–August  
866 2016. *Am J Transplant.* 17(1):296–299.
- 867 Wall DP, Fraser HB, Hirsh AE. 2003. Detecting putative orthologs. *Bioinformatics.*  
868 19(13):1710–1711.
- 869 Wickham H. 2009. *ggplot2 Elegant Graphics for Data Analysis*. New York: Springer.  
870 <https://www.springer.com/gp/book/9780387981413>
- 871 Yadav V, Sreekumar L, Guin K, Sanyal K. 2018. Five pillars of centromeric chromatin in  
872 fungal pathogens. *PLoS Pathog.* 14(8):1–7.

873 Yadav V, Yang F, Reza MH, Liu S, Valent B, Sanyal K, Naqvi NI. 2019. Cellular dynamics  
874 and genomic identity of centromeres in cereal blast fungus. *mBio*. 10(4):1–22.

875 Zhang H, Freudenreich CH. 2007. An AT-Rich sequence in human common fragile site  
876 FRA16D causes fork stalling and chromosome breakage in *S. cerevisiae*. *Mol Cell*.  
877 27(3):367–379.

878 Zhang Y, Liu T, Meyer CA, Eeckhoutte J, Johnson DS, Bernstein BE, Nussbaum C, Myers  
879 RM, Brown M, Li W, Shirley XS. 2008. Model-based analysis of ChIP-Seq (MACS).  
880 *Genome Biol*. 9(9).

## 881 **Figure Legends**

882 **Fig. 1. CENP-A<sup>Cse4</sup>-rich unique DNA sequences that are significantly depleted of histone**  
883 **H3 define small regional centromeres (CENs) in each of seven chromosomes in *C. auris***  
884 **clade 1. A**, Indirect immunolocalization of Protein A-tagged CENP-A<sup>Cse4</sup> (green) shows

885 centromeres are clustered at the periphery of the nucleus stained with DAPI (blue) at various  
886 stages of the cell cycle. Scale bar, 3  $\mu\text{m}$  **B**, CENP-A<sup>Cse4</sup> ChIP-seq reads: Input- total DNA,  
887 IP- immunoprecipitated DNA, *CEN*-input subtracted from IP. **C**, Zoomed-in CENP-A<sup>Cse4</sup>  
888 ChIP-seq peaks (red) along with ORFs (grey) and mapped RNA-seq reads (black). The peak  
889 values are indicated. **D**, Fold difference in CENP-A<sup>Cse4</sup> and histone H3 enrichment at the  
890 *CENs* compared to a control region (*far-CEN4*). qPCR values from three technical replicates  
891 are shown. The experiments were repeated thrice. Error bars indicate standard error of the  
892 mean (SEM). Statistical analysis: one-way ANOVA, \*\*\*\* P<0.0001 **E**, Dot-plot analysis  
893 reveals the absence of repeats and the unique nature of *CEN* DNA sequences **F**, *CEN*  
894 positions ( $\blacktriangle$ ) overlap with GC ( $\color{red}{\text{---}}$ ) and GC-3 ( $\text{---}$ ) scaffold minima. Coordinates (in Mb) are  
895 shown on the *x*-axis and %GC, on the *y*-axis.

896 **Fig. 2. Chromosomal rearrangements resulted in an exclusive centromere relocation in**  
897 **clade 2. A**, Diagram showing immediate *CEN* neighbourhood conservation (20 kb each to the  
898 left and right of *CENs*, marked in orange) in each of the four clades.  $\text{---}$  connects homologs;  
899 inversions, if present, are shown by  $\color{red}{\text{---}}$ . The sequence similarity is shown as a percentage. **B**,  
900 Circos plots showing synteny conservation between different clades. Scaffold numbers are  
901 shown on the outer-most track with empty circles marking centromere positions, GC-content  
902 is shown in the middle track (red, GC content below genome average and blue, AT content  
903 above genome average), and the inner-most track shows synteny blocks. A reciprocal  
904 translocation event in clade 2 is marked by \* . **C**, Linear synteny plot showing *CEN*

905 relocations in clade 2 with respect to those of clade 4. *CEN* positions in clades 1 and 3 are  
906 similar to clade 4 *CEN* locations. *CENs* are shown as chromosomal constrictions.  
907 Chromosomes are drawn to scale, and chromosomal sizes are shown. **D**, Schematic depicting  
908 segmental duplication (yellow) in clade 2, placing two copies of the centromere sequences  
909 (orange) in the same chromosome in the assembly GCA\_003013715.2. The scaffold number  
910 and the coordinates are shown. **E**, Violin plot depicting mutation rates at the centromere  
911 sequences, compared to intergenic regions in each pair of clades. Standard deviation for the  
912 mutation rates at intergenic region is shown, and the mutation rates at the centromeres are  
913 shown as Z-scores (difference from mean in units of standard deviation).

914 **Fig. 3. Conservation of centromere properties of the *C. haemulonii* complex species**  
915 **including *C. auris*.** **A**, Loci in *C. duobushaemulonii* syntenic to *C. auris* *CENs*. The outer-  
916 most track of the circos plot depicts genome scaffolds with empty circles marking *CEN*  
917 locations, the middle track depicts %GC (red- GC content below genome average, blue- AT  
918 content above genome average), and the inner-most track shows synteny blocks. **B**, *CEN*  
919 positions (▲) overlap with GC- (—) and GC-3 (—) minima. Coordinates (in Mb) are shown  
920 on the x-axis and %GC, on the y-axis. **C**, Dot-plot establishing the repeat-free and unique  
921 nature of centromere sequences in *C. duobushaemulonii*. The scaffold numbers are shown. **D**,  
922 Depletion of histone H3 at *CENs* on different scaffolds (shown on the x-axis), compared to a  
923 non-centromeric control region (far-*CEN*). qPCR values from three technical replicates,  
924 represented as percent input, are shown. The experiments were performed thrice, with similar  
925 results. Error bars indicate standard error of the mean (SEM). Statistical analysis was done  
926 using one-way ANOVA (\*\*\*\* P<0.0001).

927

928 **Fig. 4. CEN-inactivation mediated chromosome number variation in *C. auris* and *C.***  
929 ***duobushaemulonii*.** **A**, Phylogenetic tree depicting the relatedness of *C. auris* geographical  
930 clades and other member species of the *Clavispora/Candida* clade. Other species in  
931 Ascomycota with characterised/predicted centromeres are shown. *Cryptococcus neoformans*  
932 (Basidiomycota) is shown as the outgroup. The two chromosome number states detected in  
933 *Clavispora/Candida* clade are represented by *N*=7 and *N*=8. **B**, Chromosome-level view  
934 depicting the mapping of *C. lusitaniae* *CEN2* and *CEN8* onto a single scaffold in *C. auris*. —  
935 connects homologs; inversions, if present, are shown by —. Inactive *CEN* (in*CEN*) is shown  
936 as ▲. The sequence similarity of homologs is shown in the key as a percentage. **C**, ORF-

937 level view showing sequence loss and subsequent loss of AT-content at in*CEN*. **D**,  
938 Pericentric inversion in *C. auris* changing the positions of ORFs 1,2, and 3, with respect to  
939 the *C. lusitaniae* centromere (■). *C. auris* *CENs* are shown as ■. **E**, Rearrangement involving  
940 *CEN*-proximal synteny breaks separating the two synteny blocks on the same chromosome.  
941 **F**, Synteny breakpoint mapped to the centromere location in *C. auris* chromosome 2. **G**, *CEN*  
942 inactivation, **H**, pericentric inversion **I**, **J**, synteny breaks and rearrangements in *C.*  
943 *duobushaemulonii*. *CENs* are marked by ■. Inactive *CEN* is shown as ▲.

944 **Fig. 5. *C. auris* clade 2 evolved via a unique evolutionary trajectory.** **A**, Representative  
945 genome of the common ancestor of *C. auris* and the *C. haemulonii* complex species ( $N=7$ ),  
946 depicting chromosomal rearrangement patterns with respect to the common ancestor of *C.*  
947 *lusitaniae* and *C. fructus* ( $N=8$ ). *CENs* in the common ancestor ( $N=8$ ) are shown as ■, and  
948 *CENs* in the common ancestor ( $N=7$ ) are shown as ■. Homologs are connected by — and  
949 inversions, if present, are shown as —. The sequence similarity is shown as a percentage in  
950 the key. **B**, *C. lusitaniae* *CEN2* (on Chr2, L2) and *CEN8* (on Chr8, L8) map to the same  
951 scaffold in *C. auris* clades 1,3 and 4, whereas *CEN5* (on Chr5, L5) and *CEN8* map to the  
952 same scaffold in *C. auris* clade 2. Corresponding genomic scaffolds are shown in the outer-  
953 most track, and the synteny blocks are depicted in the inner-most track. The inactive  
954 centromere is marked in black and the corresponding active centromere in yellow. **C**,  
955 Terminal chromosomal translocation event resulting in the relocation of in*CEN* (▲) in clade  
956 2. Constrictions mark *CENs* syntenic to *C. lusitaniae* *CEN2* and *CEN5*. Sequence similarity  
957 is shown as a percentage in the key. **D**, A *CEN*-based model tracing the event of centromere  
958 inactivation in the common ancestor CA0, resulting in chromosome number reduction in  
959 CA2, while CA1 maintains the chromosome number of 8. CA2 represents the common  
960 ancestor of *C. auris* and *C. haemulonii* complex, and CA3 is the common ancestor of all *C.*  
961 *auris* clades. A TCT event further repositions the inactive *CEN* in clade 2, representing the  
962 unique evolutionary trajectory of *C. auris* clade 2. *CENs* are numbered using *C. lusitaniae* as  
963 the reference.

964

965

966

967

968

969 **Table 1** Centromere features in clade 1 isolate of *C. auris*  
970

| <i>CEN</i>  | Scaffold # in the reference assembly | Coordinates |         | Length (in bp)                         |                 |
|-------------|--------------------------------------|-------------|---------|----------------------------------------|-----------------|
|             |                                      | Start       | End     | CENP-A <sup>Cse4</sup> enriched region | ORF-free region |
| <i>CEN1</i> | PEKT02000007.1                       | 2686849     | 2689484 | 2635                                   | 2576            |
| <i>CEN2</i> | PEKT02000001.1                       | 1063461     | 1066333 | 2872                                   | 2398            |
| <i>CEN3</i> | PEKT02000003.1                       | 788992      | 791542  | 2550                                   | 2244            |
| <i>CEN4</i> | PEKT02000010.1                       | 712902      | 715418  | 2516                                   | 2081            |
| <i>CEN5</i> | PEKT02000009.1                       | 555667      | 558575  | 2908                                   | 2396            |
| <i>CEN6</i> | PEKT02000008.1                       | 352635      | 355378  | 2743                                   | 2192            |
| <i>CEN7</i> | PEKT02000006.1                       | 268329      | 271195  | 2866                                   | 2141            |

971  
972

973

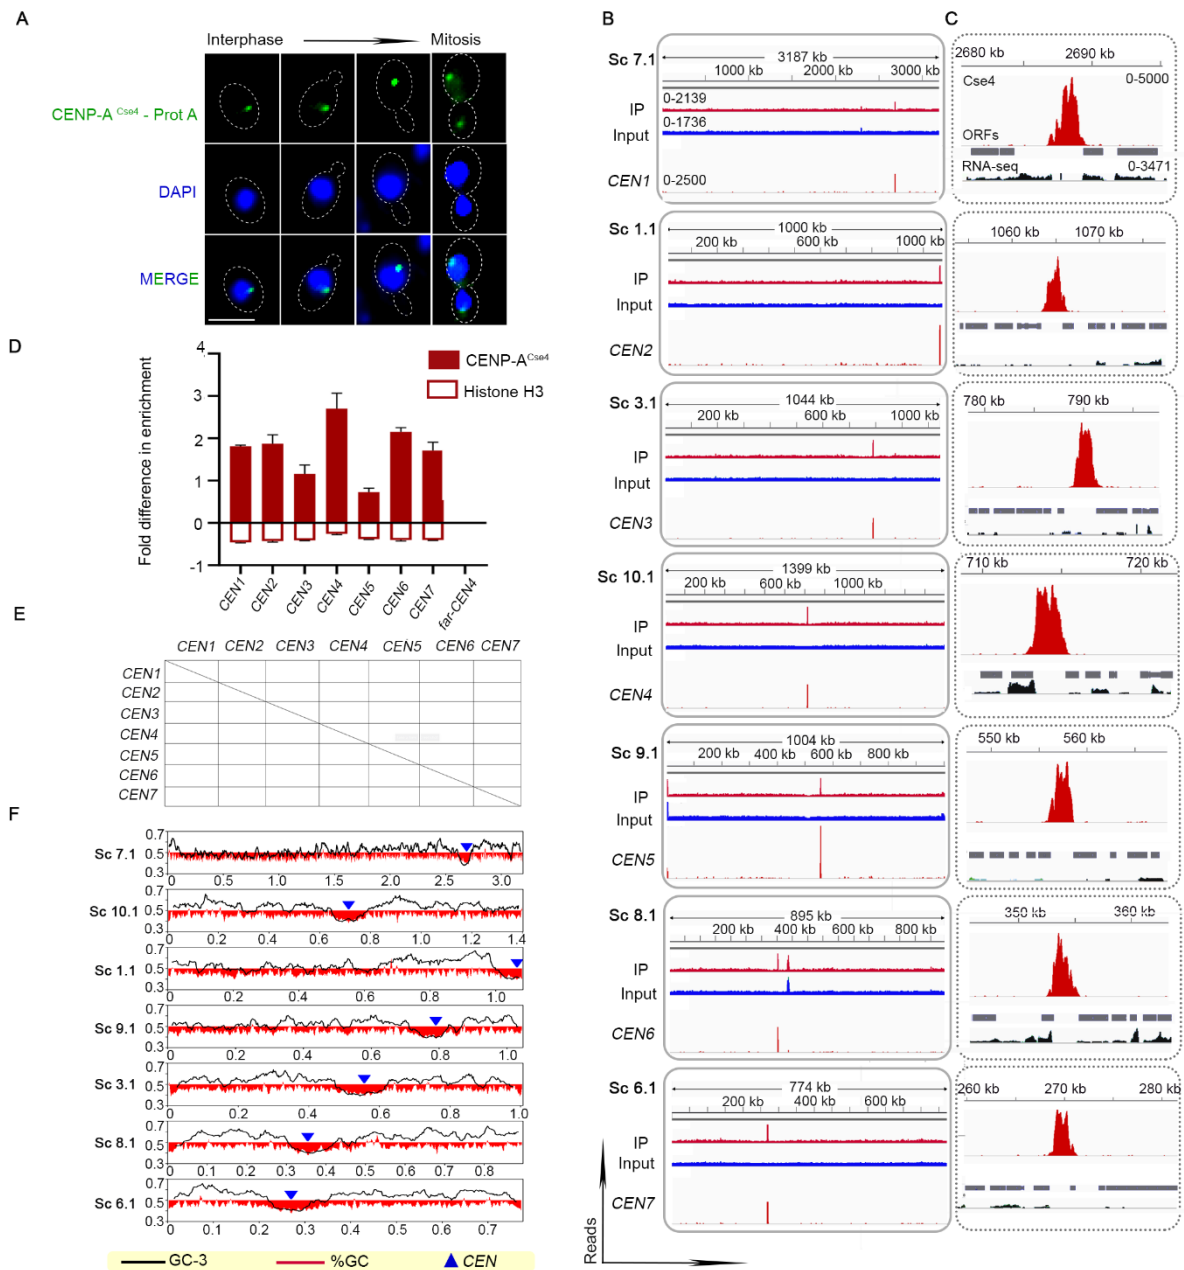

974

975 Fig. 1 CENP-A<sup>Cse4</sup>-rich unique DNA sequences that are significantly depleted of histone H3  
 976 define small regional centromeres (*CENs*) in each of seven chromosomes in *C. auris* clade  
 977 1. A, Indirect immunolocalization of Protein A-tagged CENP-A<sup>Cse4</sup> (green) shows  
 978 centromeres are clustered at the periphery of the nucleus stained with DAPI (blue) at various  
 979 stages of the cell cycle. Scale bar, 3  $\mu$ m B, CENP-A<sup>Cse4</sup> ChIP-seq reads: Input- total DNA,  
 980 IP- immunoprecipitated DNA, *CEN*-input subtracted from IP. C, Zoomed-in CENP-A<sup>Cse4</sup>  
 981 ChIP-seq peaks (red) along with ORFs (grey) and mapped RNA-seq reads (black). The peak  
 982 values are indicated. D, Fold difference in CENP-A<sup>Cse4</sup> and histone H3 enrichment at the  
 983 *CENs* compared to a control region (*far-CEN4*). qPCR values from three technical replicates  
 984 are shown. The experiments were repeated thrice. Error bars indicate standard error of the  
 985 mean (SEM). Statistical analysis: one-way ANOVA, \*\*\*\* P<0.0001 E, Dot-plot analysis  
 986 reveals the absence of repeats and the unique nature of *CEN* DNA sequences F, *CEN*  
 987 positions ( $\blacktriangle$ ) overlap with GC ( $\blacktriangleleft$ ) and GC-3 ( $\blacktriangleright$ ) scaffold minima. Coordinates (in Mb)  
 988 are shown on the x-axis and %GC, on the y-axis.

989



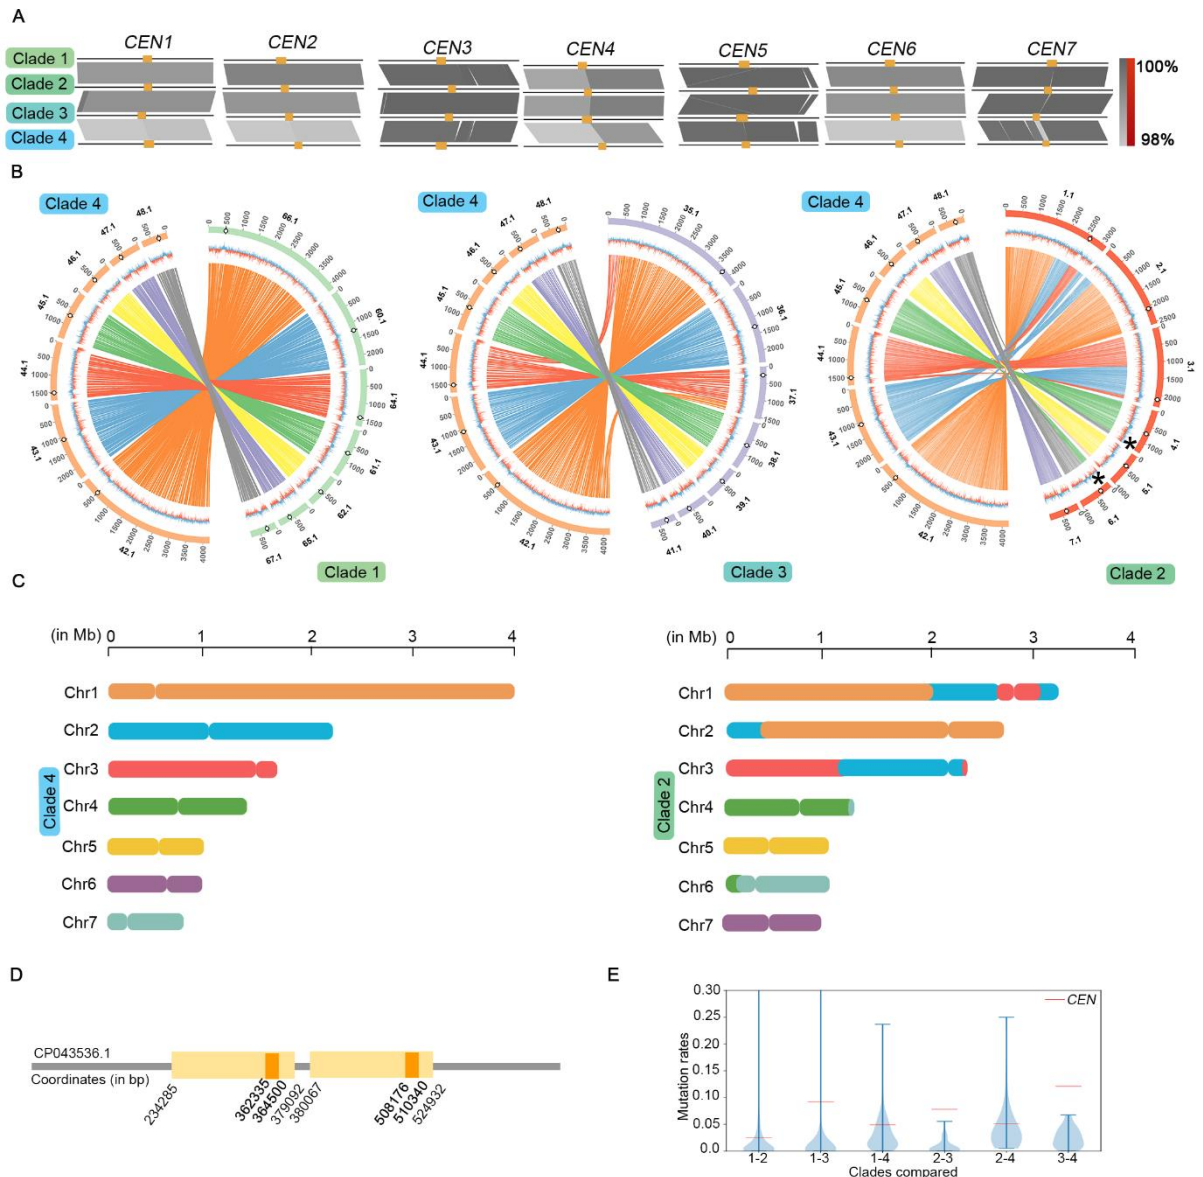

990

991 Fig. 2 Chromosomal rearrangements resulted in an exclusive centromere relocation in clade  
 992 2. A, Diagram showing immediate *CEN* neighbourhood conservation (20 kb each to the left  
 993 and right of *CEN*s, marked in orange) in each of the four clades. — connects homologs;  
 994 inversions, if present, are shown by —. The sequence similarity is shown as a percentage.  
 995 B, Circos plots showing synteny conservation between different clades. Scaffold numbers  
 996 are shown on the outer-most track with empty circles marking centromere positions, GC  
 997 content is shown in the middle track (red, GC content below genome average and blue,  
 998 AT content above genome average), and the inner-most track shows syntenic blocks. A  
 999 reciprocal translocation event in clade 2 is marked by \* . C, Linear syntenic plot showing *CEN*  
 1000 relocations in clade 2 with respect to those of clade 4. *CEN* positions in clades 1 and 3 are  
 1001 similar to clade 4 *CEN* locations. *CEN*s are shown as chromosomal constrictions.

1002 Chromosomes are drawn to scale, and chromosomal sizes are shown. D, Schematic  
 1003 depicting segmental duplication (yellow) in clade 2, placing two copies of the centromere  
 1004 sequences (orange) in the same chromosome in the assembly GCA\_003013715.2. The  
 1005 scaffold number and the coordinates are shown. E, Violin plot depicting mutation rates at the  
 1006 centromere sequences, compared to intergenic regions in each pair of clades. Standard

1007 deviation for the mutation rates at intergenic region is shown, and the mutation rates at the  
 1008 centromeres are shown as Z-scores (difference from mean in units of standard deviation).

1009

1010

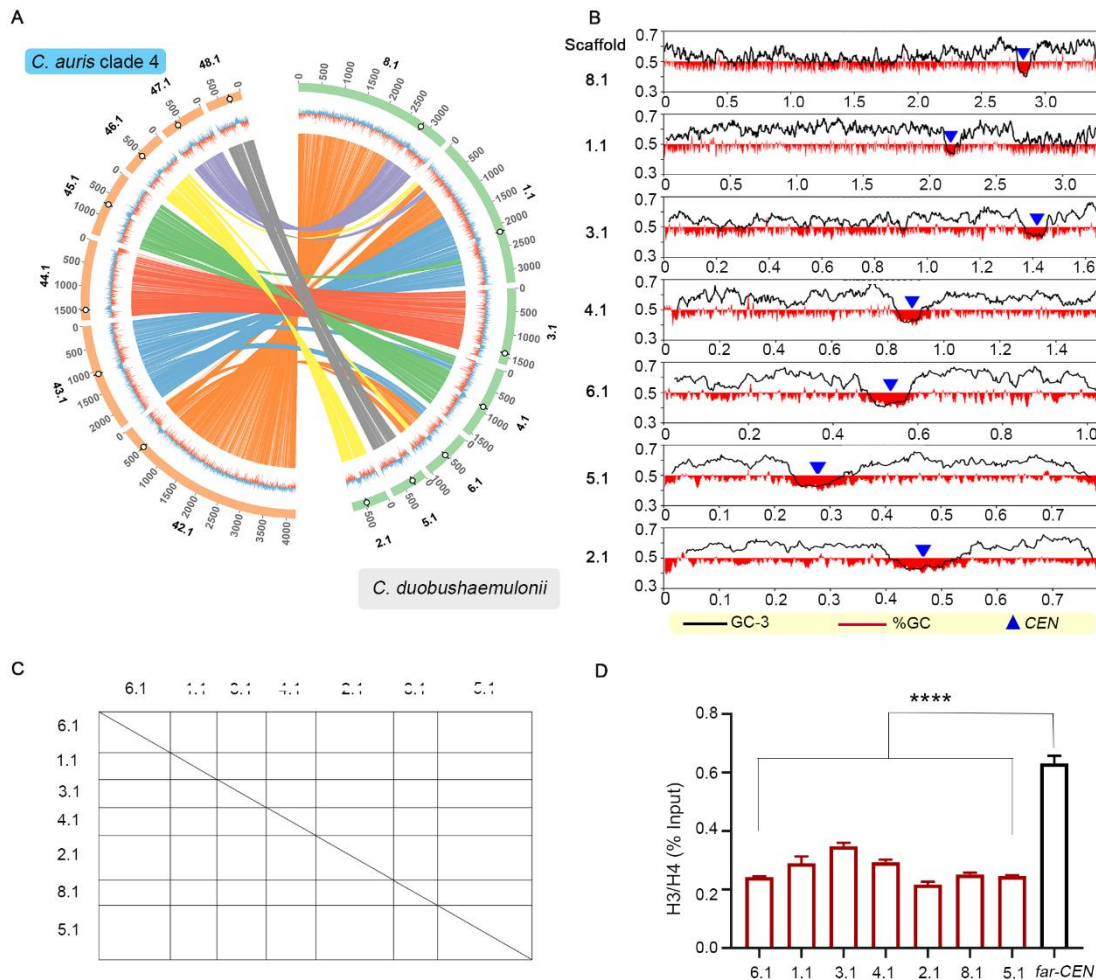

1011

1012 Fig. 3 Conservation of centromere properties of the *C. haemulonii* complex species including  
 1013 *C. auris*. A, Loci in *C. duobushaemulonii* syntenic to *C. auris* CENs. The outer-most track of  
 1014 the circos plot depicts genome scaffolds with empty circles marking CEN locations, the  
 1015 middle track depicts %GC (red- GC content below genome average, blue- AT content above  
 1016 genome average), and the inner-most track shows syntenic blocks. B, CEN positions (▲)  
 1017 overlap with GC- (—) and GC-3 (—) minima. Coordinates (in Mb) are shown on the x-axis  
 1018 and %GC, on the y-axis. C, Dot-plot establishing the repeat-free and unique nature of  
 1019 centromere sequences in *C. duobushaemulonii*. The scaffold numbers are shown. D,  
 1020 Depletion of histone H3 at CENs on different scaffolds (shown on the x-axis), compared to a  
 1021 non-centromeric control region (far-CEN). qPCR values from three technical replicates,  
 1022 represented as percent input, are shown. The experiments were performed thrice, with  
 1023 similar results. Error bars indicate standard error of the mean (SEM). Statistical analysis was  
 1024 done using one-way ANOVA (\*\*\*\* P<0.0001).

1025

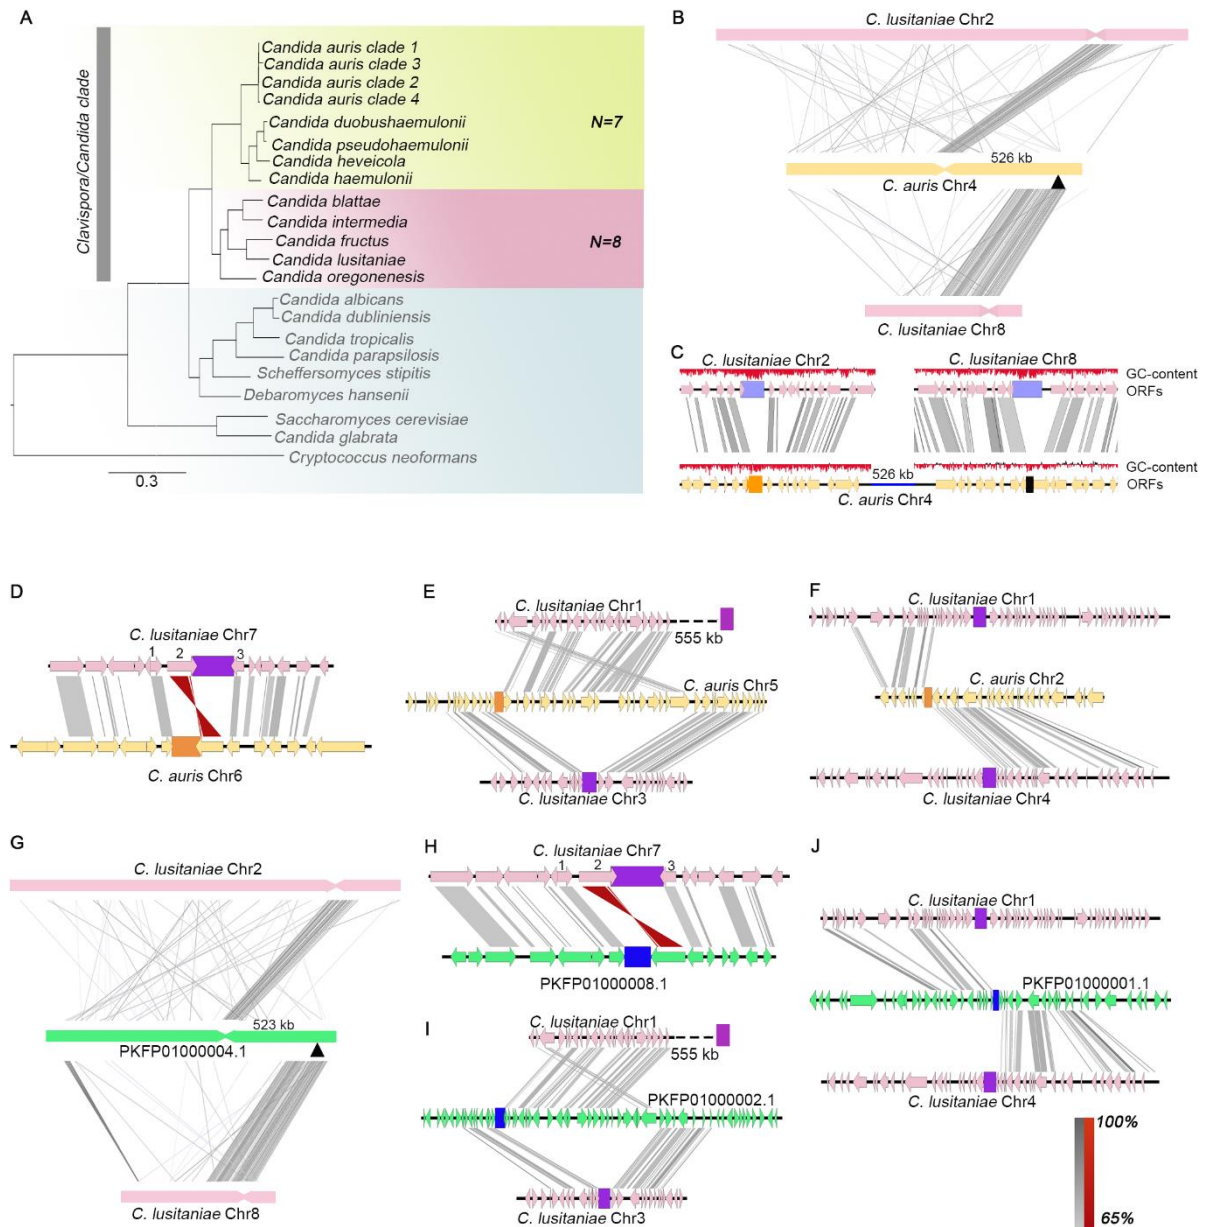

1026

1027

1028

1029

1030

1031

1032

1033

1034

1035

1036

1037

1038

1039

1040

1041

Fig. 4 CEN-inactivation mediated chromosome number variation in *C. auris* and *C. duobushaemulonii*. A, Phylogenetic tree depicting the relatedness of *C. auris* geographical clades and other member species of the *Clavispora/Candida* clade. Other species in Ascomycota with characterised/predicted centromeres are shown. *Cryptococcus neoformans* (Basidiomycota) is shown as the outgroup. The two chromosome number states detected in *Clavispora/Candida* clade are represented by  $N=7$  and  $N=8$ . B, Chromosome-level view depicting the mapping of *C. lusitaniae* *CEN2* and *CEN8* onto a single scaffold in *C. auris*. — connects homologs; inversions, if present, are shown by —. Inactive *CEN* (in*CEN*) is shown as ▲. The sequence similarity of homologs is shown in the key as a percentage. C, ORF-level view showing sequence loss and subsequent loss of AT-content at in*CEN*. D, Pericentric inversion in *C. auris* changing the positions of ORFs 1, 2, and 3, with respect to the *C. lusitaniae* centromere (■). *C. auris* *CENs* are shown as ■. E, Rearrangement involving *CEN*-proximal synteny breaks separating the two synteny blocks on the same chromosome. F, Synteny breakpoint mapped to the centromere location in *C. auris* chromosome 2. G, *CEN* inactivation, H, pericentric inversion I, J, synteny breaks and



1042 rearrangements in *C. duobushaemulonii*. *CENs* are marked by ■. Inactive *CEN* is shown as ▲.  
 1043  
 1044  
 1045

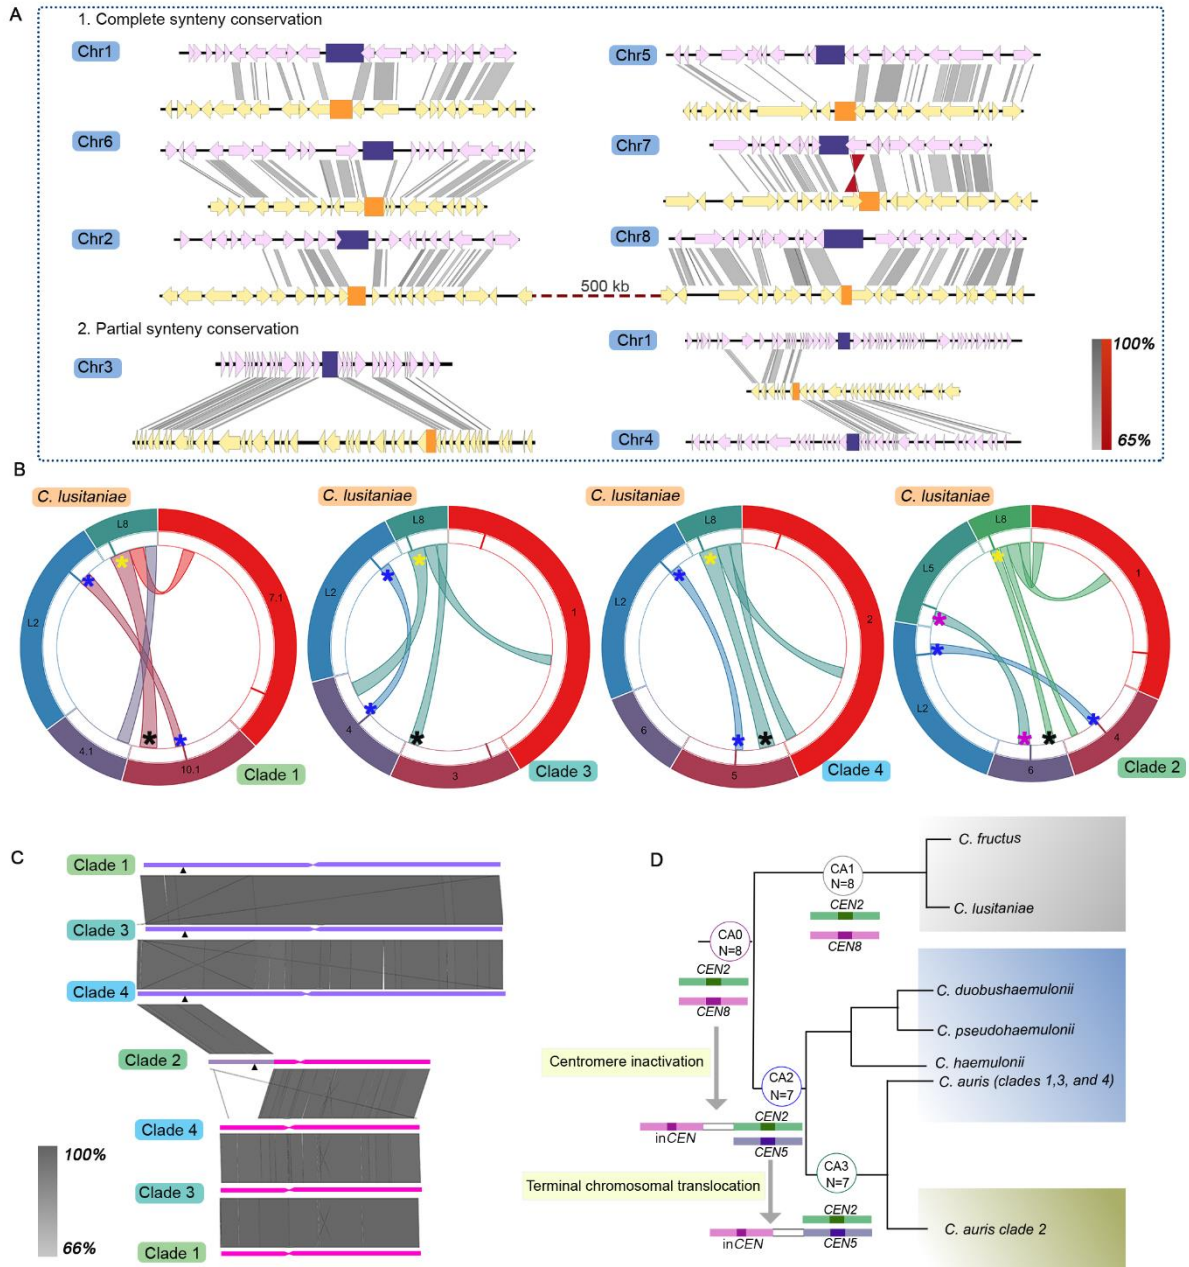

1046

1047 Fig. 5 *C. auris* clade 2 evolved via a unique evolutionary trajectory. A, Representative  
 1048 genome of the common ancestor of *C. auris* and the *C. haemulonii* complex species ( $N=7$ ),  
 1049 depicting chromosomal rearrangement patterns with respect to the common ancestor of *C.*  
 1050 *lusitaniae* and *C. fructus* ( $N=8$ ). *CENs* in the common ancestor ( $N=8$ ) are shown as ■, and  
 1051 *CENs* in the common ancestor ( $N=7$ ) are shown as ■. Homologs are connected by — and  
 1052 inversions, if present, are shown as —. The sequence similarity is shown as a percentage in  
 1053 the key. B, *C. lusitaniae* *CEN2* (on Chr2, L2) and *CEN8* (on Chr8, L8) map to the same  
 1054 scaffold in *C. auris* clades 1,3 and 4, whereas *CEN5* (on Chr5, L5) and *CEN8* map to the  
 1055 same scaffold in *C. auris* clade 2. Corresponding genomic scaffolds are shown in the outer-  
 1056 most track, and the syntenic blocks are depicted in the inner-most track. The inactive

1057 centromere is marked in black and the corresponding active centromere in yellow. C,  
1058 Terminal chromosomal translocation event resulting in the relocation of inCEN (▲) in clade  
1059 2. Constrictions mark CENs syntenic to *C. lusitaniae* CEN2 and CEN5. Sequence similarity  
1060 is shown as a percentage in the key. D, A CEN-based model tracing the event of centromere  
1061 inactivation in the common ancestor CA0, resulting in chromosome number reduction in  
1062 CA2, while CA1 maintains the chromosome number of 8. CA2 represents the common  
1063 ancestor of *C. auris* and *C. haemulonii* complex, and CA3 is the common ancestor of all *C.*  
1064 *auris* clades. A TCT event further repositions the inactive CEN in clade 2, representing the  
1065 unique evolutionary trajectory of *C. auris* clade 2. CENs are numbered using *C. lusitaniae* as  
1066 the reference.  
1067  
1068  
1069
